# Supplementary material for: Knowledge, Attitudes, and Practices Survey among Nursing Care Workers Involved in Caring for Older Adults during the Early Stage of the COVID-19 Pandemic in Japan
Source: Int J Environ Res Public Health. 2022 Oct 11;19(20):12993. doi: 10.3390/ijerph192012993 (PMC9602712; doi:10.3390/ijerph192012993)
Supplement: Supplementary file 1 [file ijerph-19-12993-s001.zip › Dataset S1.xlsx]

## Sheet: Nursing care worker_data
ID	Q1	Q2	Q3	Q4	Q5	Q6	Q7	Q8	Q9	Q10	Q11	Q12_1	Q12_2	Q12_3	Q12_4	Q12_5	Q12_6	Q12_7	Q12_8	Q12_9	Q13_1	Q13_2	Q13_3	Q13_4	Q13_5	Q13_6	Q13_7	Q13_8	Q13_9	Q13_10	Q13_11	Q13_12	Q14	Q15	Q16	Q17_1	Q17_2	Q17_3	Q17_4	Q17_5	Q17_6	Q17_7	Q18	Q19	Q20_1	Q20_2	Q20_3	Q20_4	Q20_5
1	49	2	1	3	5	3	1	1	2	2	2	2	1	1	1	1	1	1	1	1	1	2	2	2	1	2	2	2	2	2	2	2	2	1	1	1	1	1	1	1	1	1	2	1	2	1	1	1	1
2	80	2	1	3	2	33	1	1	2	2	2	2	1	1	1	1	2	2	2	2	1	2	2	2	2	1	2	2	2	2	2	2	1	#NULL!	1	1	1	1	2	2	2	1	3	3	1	1	1	1	1
3	49	2	1	3	3	1	1	2	2	2	2	2	2	1	2	2	1	2	2	2	1	2	2	2	2	2	2	2	2	2	2	2	1	1	1	1	1	1	1	1	2	1	1	1	1	1	1	1	1
4	55	2	1	3	5	14	3	2	2	2	2	2	1	1	2	2	2	2	2	2	1	2	1	1	2	2	2	2	2	2	2	2	1	1	1	1	1	1	2	1	1	1	3	3	2	2	1	1	1
5	35	2	1	#NULL!	4	2	7	2	2	2	2	2	2	2	2	2	1	2	2	2	1	2	2	2	2	2	2	2	2	2	2	2	1	1	1	1	1	1	2	2	2	2	3	3	2	1	1	1	1
6	26	2	2	6	4	3	1	2	2	2	2	2	1	2	2	2	2	2	2	2	2	2	1	2	2	2	2	2	2	2	2	2	1	1	2	2	2	1	2	2	2	2	3	3	2	2	1	2	2
7	24	2	2	4	1	1.5	1	2	2	2	1	2	1	1	1	2	2	2	2	2	1	2	1	2	1	2	2	2	1	2	2	2	1	1	1	1	1	1	2	2	2	2	3	3	2	1	1	1	1
8	26	2	2	5	1	4	1	1	2	2	1	2	1	1	2	1	1	2	2	2	1	2	1	2	1	1	2	2	2	2	2	2	1	1	1	1	1	1	2	1	2	1	3	1	2	1	1	1	1
9	27	1	1	3	5	5	1	2	2	2	2	2	2	1	2	2	1	1	2	1	1	2	1	1	1	2	2	2	2	2	2	2	1	1	1	1	1	1	2	2	2	2	1	1	2	1	1	1	1
10	39	2	1	3	5	1	1	2	2	2	3	2	1	1	1	1	1	1	2	1	1	1	1	1	1	2	2	2	2	2	2	2	3	1	1	1	1	1	1	1	1	1	1	1	2	1	1	1	1
11	44	2	1	3	3	5	1	2	2	2	2	2	1	1	2	2	1	1	2	2	1	2	1	2	1	2	2	2	2	2	2	2	3	1	1	1	1	1	2	2	2	1	3	1	2	1	1	1	1
12	29	2	1	3	1	1	7	1	2	2	2	2	1	1	2	1	2	2	2	2	1	2	1	2	2	2	2	2	2	2	2	2	1	1	1	1	2	1	2	1	2	1	3	3	2	1	1	1	1
13	28	2	1	3	4	10	1	2	2	2	2	2	2	1	1	2	1	1	1	1	1	1	1	2	2	2	2	2	2	2	2	2	1	1	1	1	1	1	2	2	2	1	3	3	2	1	1	1	1
14	30	2	1	3	1	8	1	2	2	2	3	2	2	1	2	2	2	2	2	2	1	2	2	2	2	2	2	2	2	2	2	2	3	1	1	2	1	1	2	2	2	2	3	3	2	1	1	2	1
15	64	2	1	4	2	3	1	2	2	2	2	2	1	1	1	1	1	1	1	1	1	1	1	2	1	2	1	2	1	2	2	2	2	1	1	1	1	1	1	1	1	1	3	1	2	1	1	1	1
16	25	2	2	6	#NULL!	#NULL!	1	2	2	2	1	2	1	1	2	2	2	2	2	2	2	2	1	2	2	2	2	2	2	2	2	2	1	1	1	1	1	1	1	1	2	2	1	1	2	1	1	1	1
17	59	2	1	3	4	#NULL!	7	2	2	2	2	2	1	1	2	2	1	2	2	2	1	2	2	2	2	1	2	2	2	2	2	2	1	1	1	1	1	1	2	2	2	1	3	3	2	1	1	1	1
18	46	2	1	4	2	0.25	1	2	2	2	1	2	1	1	1	1	2	1	2	1	1	2	1	2	2	2	2	2	2	2	2	2	2	2	1	1	1	1	1	1	2	2	1	1	2	1	1	1	1
19	35	2	1	3	1	17	1	2	2	2	3	2	1	1	2	2	1	2	2	2	1	2	2	2	2	2	2	2	2	2	2	2	3	2	1	1	1	1	2	1	2	1	1	1	2	1	2	2	1
20	26	2	1	3	3	8	1	2	2	2	2	2	1	1	2	2	2	1	2	1	1	2	1	2	2	2	2	2	2	2	2	2	1	1	1	1	1	1	2	1	2	1	2	1	2	1	1	1	1
21	45	1	1	5	3	1.5	7	2	2	2	2	2	1	1	1	1	1	2	2	2	1	2	1	1	2	2	2	2	2	2	2	2	1	1	1	1	1	1	1	1	2	1	3	3	2	1	1	1	1
22	25	2	2	6	3	#NULL!	1	2	2	2	2	2	1	2	2	2	2	2	2	2	2	2	1	2	2	2	2	2	2	2	2	2	1	2	1	2	2	1	2	2	2	2	1	3	1	2	1	2	2
23	29	1	2	4	1	2	1	1	2	3	2	2	1	2	2	2	2	2	2	2	2	2	1	2	2	2	2	2	2	2	2	2	1	1	1	1	1	1	2	2	2	2	3	1	2	2	1	2	1
24	37	2	1	4	6	7	1	2	2	2	3	2	2	1	2	2	2	1	2	2	1	2	1	1	2	2	2	2	2	2	2	2	1	1	1	1	1	1	2	1	2	1	3	3	2	1	1	1	1
25	26	2	1	6	1	1.5	1	2	2	2	1	2	1	1	1	2	2	2	2	2	2	2	1	1	1	2	2	2	2	2	2	2	2	#NULL!	1	1	1	1	1	1	2	1	3	1	2	1	1	1	1
26	40	2	1	3	3	#NULL!	1	2	2	2	2	2	1	1	2	1	1	1	2	1	1	2	1	1	1	2	2	2	2	2	2	2	1	1	1	1	1	1	2	1	2	1	1	1	2	1	1	1	1
27	55	2	1	3	2	23	3	2	2	2	1	2	1	2	2	2	2	1	1	2	1	2	2	2	2	2	2	2	2	2	2	2	1	1	1	1	1	1	1	1	1	1	2	1	2	1	1	1	1
28	29	2	1	3	2	1	1	2	2	2	2	2	1	1	1	1	2	1	2	2	1	2	1	1	1	2	2	2	2	2	2	2	1	1	1	1	1	1	2	1	2	1	3	3	2	1	1	1	1
29	52	2	1	3	2	1	1	2	2	2	2	2	1	1	2	1	1	2	2	2	1	2	1	2	2	2	2	2	2	2	2	2	1	1	1	1	1	1	2	1	1	1	1	1	2	1	1	1	1
30	53	2	1	5	3	8	1	2	2	2	2	2	1	1	2	1	1	1	1	1	1	2	1	1	1	2	2	1	2	2	2	2	1	1	1	1	1	1	1	1	1	1	1	1	2	1	1	1	1
31	23	2	2	6	3	1	1	2	2	2	2	2	1	2	2	2	2	2	2	2	2	2	1	2	2	2	2	2	2	2	2	2	1	1	2	2	2	1	2	2	2	2	1	1	2	2	1	2	2
32	47	2	1	4	6	8	1	2	2	2	2	2	1	1	2	2	2	2	2	2	1	2	1	1	1	2	2	2	2	2	2	2	1	1	1	1	1	1	2	2	2	1	1	1	2	1	1	1	1
33	50	2	1	5	2	0.25	1	2	2	2	2	2	2	1	2	2	1	1	2	1	1	2	1	1	2	2	2	2	2	2	2	2	1	1	1	1	1	1	2	2	2	1	2	3	2	1	1	1	1
34	50	2	1	5	4	18	1	2	2	2	3	2	2	1	2	2	1	1	2	2	1	2	2	2	2	2	2	2	2	2	2	2	1	1	1	1	1	1	2	2	2	1	1	1	2	1	1	1	1
35	24	1	1	5	4	1	1	2	2	2	3	2	1	1	1	1	1	1	2	1	1	2	1	1	2	2	2	2	2	2	2	2	3	1	1	1	1	1	1	2	2	1	2	1	2	1	1	1	1
36	32	2	1	6	1	3	1	2	2	2	2	2	1	1	2	2	2	2	2	2	2	2	1	2	1	2	2	2	2	2	2	2	2	2	1	1	2	1	2	1	2	2	3	1	1	1	1	1	1
37	51	2	1	5	1	0	1	2	2	2	2	2	1	1	2	1	1	1	2	1	2	2	1	2	2	2	2	1	1	2	2	2	2	2	2	1	2	1	2	1	2	1	3	1	2	1	1	1	1
38	31	1	2	6	1	12	1	2	2	2	1	2	1	1	1	1	1	1	1	1	2	2	1	1	1	2	2	2	2	2	2	2	2	1	1	1	1	1	1	1	1	1	3	3	2	1	1	1	1
39	33	2	1	4	2	1	1	2	2	2	2	2	2	1	2	2	1	1	2	2	1	2	1	2	1	2	2	2	2	2	2	2	1	1	1	1	1	2	2	2	2	2	1	1	2	1	1	1	1
40	55	2	1	3	2	4	1	2	2	2	3	2	2	2	2	2	1	2	2	2	1	2	1	2	1	2	2	2	2	2	2	2	3	1	1	1	1	1	2	2	2	2	1	1	2	1	1	1	1
41	53	2	1	3	2	0.5	1	2	2	2	2	2	1	1	2	1	1	1	2	1	1	2	1	2	1	2	2	2	2	2	2	1	1	1	1	1	1	1	2	2	2	1	3	2	2	1	1	1	1
42	52	2	1	3	3	7	1	2	2	3	3	2	1	1	2	1	1	2	2	2	1	2	1	2	1	2	2	2	2	2	2	2	1	1	1	1	1	1	2	2	2	1	3	3	2	1	1	1	1
43	28	2	1	3	4	10	1	2	2	2	3	2	2	1	1	2	1	1	2	2	1	2	1	2	2	2	2	2	2	2	2	2	1	1	1	1	1	1	2	2	1	1	3	3	2	1	1	1	1
44	60	2	1	2	2	22	7	2	2	2	2	2	1	1	1	1	1	1	1	1	1	2	1	1	1	2	2	1	1	2	2	2	1	1	1	1	1	1	2	2	2	1	1	1	2	1	1	1	1
45	41	2	1	4	3	15	7	2	2	2	2	2	1	1	2	2	1	1	2	2	1	2	2	2	2	2	2	2	2	2	2	2	1	1	1	1	1	1	2	1	2	1	2	1	2	1	1	1	1
46	61	2	1	5	1	#NULL!	1	1	2	2	2	2	1	1	2	1	2	2	2	2	1	2	1	2	1	2	2	2	2	2	2	2	1	1	1	2	2	2	2	2	2	2	1	1	2	1	1	2	1
47	44	2	1	4	1	16.75	1	2	2	2	2	2	1	1	1	1	1	1	1	1	1	2	1	2	1	2	2	2	2	2	2	2	1	1	1	1	1	1	2	2	2	1	3	1	2	1	1	1	1
48	25	1	1	3	5	7	7	2	2	2	2	2	1	2	1	2	1	1	2	2	1	2	1	2	1	2	2	2	2	2	2	2	1	1	1	1	1	2	2	2	2	2	3	1	2	1	1	1	1
49	61	2	1	5	2	9	1	2	2	2	1	2	1	1	1	1	1	1	1	1	2	2	1	2	2	2	2	1	1	2	2	2	1	1	1	1	1	1	1	1	1	1	1	1	2	1	1	1	1
50	56	2	2	5	3	#NULL!	1	2	2	2	3	2	1	1	2	2	2	2	2	2	1	2	1	2	1	2	2	1	2	2	2	2	3	2	1	1	1	1	1	1	2	1	3	3	2	1	1	1	1
51	58	2	1	4	2	17	1	2	2	2	2	2	1	1	1	1	1	1	1	1	1	2	1	2	2	2	2	2	2	2	2	2	1	2	1	1	1	1	1	1	2	1	2	1	2	1	1	1	1
52	40	2	1	4	4	10	1	2	2	2	3	2	1	1	2	1	1	2	2	2	1	2	1	2	2	2	2	2	1	2	2	2	3	1	1	1	1	1	1	1	1	1	3	1	2	1	1	1	1
53	29	2	1	#NULL!	3	#NULL!	1	2	2	2	2	2	1	1	1	2	1	1	1	1	1	2	2	2	2	2	2	2	2	2	2	2	1	1	1	1	1	1	1	1	2	1	1	1	2	1	1	1	1
54	21	2	1	4	4	2	1	2	2	2	3	2	1	1	1	1	1	1	1	1	1	2	1	1	1	2	2	2	1	2	2	2	1	1	1	1	1	1	2	2	2	2	1	1	2	1	1	1	1
55	27	2	2	4	5	3	3.5	2	2	2	1	2	1	1	1	1	1	1	1	1	1	2	1	1	1	2	2	1	1	2	2	2	2	2	1	1	1	1	2	2	2	2	2	2	2	2	1	1	1
56	37	2	1	3	3	10	1	2	2	2	2	2	1	1	2	2	1	2	2	2	1	2	1	2	1	2	2	2	2	2	2	2	1	1	1	1	1	1	1	1	2	1	3	3	2	1	1	1	1
57	42	1	1	3	5	10	1	2	2	2	2	2	1	1	2	2	1	2	2	2	1	2	1	1	2	2	2	2	2	2	2	2	1	1	1	1	1	1	1	1	1	1	3	1	2	1	1	1	1
58	56	1	1	4	4	1	1	2	2	2	2	2	2	1	2	2	1	2	2	2	1	2	2	2	2	2	2	2	2	2	2	2	2	1	1	1	2	1	2	2	2	1	3	1	2	1	1	1	1
59	57	2	1	4	4	4	1	2	2	2	2	2	1	1	2	2	1	2	2	1	1	2	2	2	2	2	2	2	2	2	2	1	1	1	1	1	2	1	2	2	2	1	1	1	2	1	1	2	1
60	46	1	1	4	4	33	1	2	2	2	2	2	2	1	1	1	1	1	2	1	1	2	1	2	2	2	2	2	2	2	2	2	1	1	1	1	1	1	2	1	1	2	3	1	2	1	1	1	1
61	55	2	1	4	2	17	3	2	2	2	1	2	1	1	2	1	1	2	2	2	1	2	1	2	2	2	2	1	2	2	2	2	1	1	1	1	1	1	2	2	2	2	1	1	2	1	1	1	1
62	65	2	1	5	6	25	1	2	2	2	2	2	1	1	2	1	1	1	2	1	1	2	2	2	2	2	2	2	2	2	2	1	1	1	1	1	1	1	2	2	2	1	1	1	2	1	1	1	1
63	44	1	1	4	3	7	1	2	2	2	2	2	1	1	1	1	1	1	1	1	1	1	1	1	1	2	2	2	2	2	1	2	1	1	1	1	1	1	2	2	1	1	1	1	2	1	1	1	1
64	43	1	1	4	6	14	1	2	2	2	2	2	2	2	2	2	2	1	2	2	1	2	1	2	2	2	2	2	2	2	2	2	1	1	1	1	1	1	2	2	2	1	3	1	2	1	1	1	1
65	52	2	1	2	3	6	1	2	2	2	2	2	2	1	2	2	1	1	2	2	1	2	1	2	1	2	2	2	2	2	2	2	3	1	1	1	2	1	2	1	2	1	1	1	2	1	1	1	1
66	62	2	1	3	2	10	3	2	2	2	2	2	2	2	2	1	2	2	2	2	1	1	1	2	2	2	2	2	2	2	2	2	3	1	1	1	1	1	1	1	1	1	1	1	2	1	1	2	1
67	41	2	2	5	1	#NULL!	1	2	2	3	2	2	1	1	1	1	1	1	1	1	1	1	1	1	2	2	2	2	2	2	1	2	1	1	1	1	1	1	2	2	2	1	1	1	2	1	1	1	1
68	33	2	1	3	5	6	1	2	2	2	3	2	1	1	2	2	2	2	2	2	1	2	1	1	1	2	2	2	2	2	2	2	2	1	1	1	1	1	2	1	2	2	3	3	1	1	1	1	1
69	35	2	1	5	4	13	1	2	2	2	2	2	1	1	1	2	1	2	2	2	1	2	1	1	1	2	2	2	2	2	2	2	1	1	1	1	1	1	2	2	2	1	1	1	1	1	1	1	1
70	34	2	1	4	6	7	1	2	2	2	2	2	1	1	1	1	1	1	2	1	1	2	1	2	2	2	2	2	2	2	2	2	#NULL!	#NULL!	#NULL!	#NULL!	#NULL!	#NULL!	#NULL!	#NULL!	#NULL!	#NULL!	#NULL!	#NULL!	#NULL!	#NULL!	#NULL!	#NULL!	#NULL!
71	70	1	1	3	1	4	1	2	2	2	3	2	2	2	1	1	2	2	2	2	1	2	2	2	2	2	2	2	2	2	2	2	2	1	1	1	1	1	2	2	2	1	1	1	2	1	1	1	1
72	63	2	1	4	2	2	1	2	2	2	2	2	1	1	2	1	1	1	2	2	1	2	2	2	2	2	2	1	2	2	2	2	1	1	1	1	1	1	2	2	2	1	3	1	2	1	1	1	1
73	49	2	1	3	1	17	3	2	2	2	2	2	1	1	1	1	1	1	2	1	1	2	1	2	2	2	2	2	2	2	2	2	2	1	1	1	1	1	1	1	2	1	1	1	2	1	1	1	1
74	55	2	1	3	3	1	1	2	2	2	2	2	2	1	2	1	1	1	2	1	1	2	1	2	1	2	2	2	2	2	2	2	2	1	1	1	1	1	2	2	2	1	1	1	2	1	1	1	1
75	57	2	1	3	2	9	#NULL!	2	2	2	2	2	1	1	2	1	2	2	2	2	1	2	1	1	1	2	2	2	2	2	2	2	2	1	1	1	2	1	1	2	2	1	2	1	2	1	1	1	1
76	20	2	1	3	2	1	1	2	2	2	2	2	1	1	1	2	2	1	2	2	1	2	1	1	1	2	2	2	2	2	2	2	3	1	1	1	1	1	1	1	1	1	1	2	2	1	1	1	1
77	60	2	1	3	2	10	1	2	2	2	2	2	1	1	2	1	1	2	2	2	1	2	2	1	2	2	2	1	2	2	2	2	2	1	1	1	1	1	2	2	2	1	1	1	2	1	1	2	1
78	45	2	1	3	4	3	1	2	2	2	3	1	2	2	2	2	2	2	2	2	1	2	1	1	1	2	2	2	2	2	2	2	1	1	1	1	1	1	2	1	1	1	3	3	2	1	1	1	1
79	47	2	1	5	2	13	1	2	2	2	2	2	1	1	2	1	1	2	2	2	1	1	1	2	2	2	1	1	2	2	2	2	1	1	1	1	1	1	1	1	1	1	2	1	2	1	1	1	1
80	67	1	1	3	3	3	1	2	2	2	2	2	1	2	1	1	1	2	2	2	1	1	1	2	2	2	2	2	2	2	1	2	3	1	1	1	2	2	2	2	2	2	2	3	2	1	1	2	2
81	23	1	1	3	4	3	1	2	2	2	3	2	1	1	1	1	1	2	2	2	1	2	2	1	1	2	2	2	2	2	2	2	2	1	1	1	1	1	2	2	1	2	1	1	2	1	1	1	1
82	38	1	1	4	4	5	1	2	2	2	3	2	1	2	2	2	2	2	2	2	1	2	2	2	2	2	2	2	2	2	2	2	1	1	2	1	1	1	2	2	2	2	1	1	2	1	2	2	2
83	51	2	1	3	3	#NULL!	1	2	2	2	2	2	1	2	2	1	1	1	2	2	1	2	1	2	2	2	2	1	2	2	2	2	1	1	1	1	1	1	2	2	2	1	1	1	2	1	1	1	1
84	57	2	1	4	5	23	1	2	2	2	2	2	1	1	1	1	1	1	2	2	1	1	1	1	1	2	2	1	2	2	2	2	3	1	1	1	1	1	1	1	1	1	1	1	2	1	1	1	1
85	63	1	1	5	2	11	5	2	2	2	2	2	2	1	2	2	1	1	2	1	1	2	1	2	2	2	2	2	2	2	2	2	1	1	1	1	1	1	1	1	1	1	1	1	2	1	1	1	1
86	44	1	1	5	2	23	3.5	2	2	2	2	2	1	2	2	2	1	1	2	2	1	2	1	2	2	2	2	2	2	2	2	2	1	1	1	2	2	2	2	2	2	2	3	3	2	1	1	1	1
87	50	1	1	5	5	2	1	2	2	2	2	2	1	1	2	1	1	1	2	2	1	2	1	2	2	2	2	2	2	2	2	2	1	1	1	1	1	1	2	2	2	2	1	1	2	1	1	1	1
88	49	2	1	4	4	7	1	2	2	2	3	1	1	1	1	1	1	2	2	2	1	2	1	1	1	2	2	1	2	2	2	2	1	1	1	1	1	1	2	1	1	1	1	1	1	#NULL!	1	1	1
89	66	1	1	#NULL!	2	14	1	2	2	2	3	2	1	2	2	1	2	2	2	2	1	2	2	2	2	2	2	2	2	2	2	2	1	2	1	1	1	1	1	1	1	1	3	1	2	1	1	1	1
90	55	2	1	4	3	7	1	2	2	2	2	2	1	1	2	1	1	1	1	1	1	1	2	2	2	2	2	1	2	2	2	2	3	1	1	1	1	1	2	2	2	1	3	3	2	1	1	1	1
91	54	2	1	4	3	9	1	2	2	2	3	2	1	1	1	1	1	1	2	1	1	2	1	2	1	2	2	2	2	2	2	2	1	1	1	1	1	1	1	1	1	1	3	3	2	1	1	1	1
92	63	2	1	3	2	15	1	2	2	2	2	2	1	1	2	1	1	1	1	1	1	2	1	2	1	2	2	2	2	2	2	2	3	1	1	1	1	1	2	2	2	1	3	3	1	1	1	1	1
93	50	2	1	3	4	8	5	2	2	2	2	2	1	1	2	1	2	1	2	2	1	2	2	2	1	2	2	2	2	2	2	2	1	1	2	1	1	1	1	2	2	1	3	3	2	2	1	1	1
94	57	1	1	2	2	16	7	2	2	2	3	2	2	1	2	2	2	2	2	1	1	2	2	2	2	2	2	2	2	2	2	2	3	1	1	1	2	1	2	1	2	1	3	1	2	1	1	1	1
95	53	1	1	5	3	31	1	2	2	2	3	2	2	2	2	1	1	1	1	1	1	2	2	2	2	2	1	2	2	2	2	2	3	1	1	1	1	1	1	2	2	1	1	1	2	1	2	1	1
96	66	2	1	4	3	9	5	2	2	2	2	2	2	1	2	1	1	1	2	2	1	2	1	1	1	2	2	1	2	2	2	2	2	1	1	1	2	1	1	1	2	1	1	1	2	1	1	1	1
97	27	2	1	3	4	9	1	2	2	2	2	2	1	1	1	1	1	1	2	2	1	2	1	1	1	2	2	2	2	2	2	2	1	1	1	1	1	2	2	1	2	1	3	1	2	1	1	1	1
98	66	2	1	3	3	18	5	2	2	2	2	2	1	2	2	1	2	1	2	2	1	2	2	2	1	2	2	1	2	2	2	2	3	1	1	1	2	1	2	1	2	1	1	1	2	1	1	1	1
99	32	2	2	5	1	1.5	7	2	2	2	1	2	1	1	1	1	1	1	1	1	1	2	1	1	1	2	2	2	1	2	2	2	1	1	1	1	1	1	2	2	2	2	1	1	2	1	1	1	1
100	62	1	1	5	3	1	4	2	2	2	2	2	1	1	2	1	1	1	2	2	1	2	1	2	2	2	2	2	2	2	2	2	3	1	1	1	1	2	2	2	2	1	3	1	2	1	1	1	1
101	72	1	1	5	1	3	1	2	2	2	2	2	1	1	1	1	1	1	1	1	1	1	2	2	1	2	2	1	2	2	2	2	1	1	1	1	1	1	1	1	2	1	3	3	2	1	1	1	1
102	83	2	1	2	1	5	7	2	2	2	1	2	1	2	2	1	2	2	1	2	1	2	1	2	1	2	2	1	2	2	2	2	1	1	1	1	1	2	2	2	1	2	3	3	2	1	1	1	1
103	21	2	1	4	4	1	1	2	2	2	3	2	2	1	2	1	1	1	2	2	1	2	2	1	2	2	2	2	2	2	2	2	1	1	2	1	1	1	2	1	2	1	3	3	2	1	1	1	1
104	54	2	1	4	2	3	7	2	2	2	2	2	2	1	2	1	2	2	2	2	1	2	1	2	2	2	2	2	2	2	2	2	3	2	1	1	2	1	2	2	2	1	2	1	2	1	2	1	1
105	76	2	1	3	#NULL!	5	1	2	2	2	2	2	1	2	2	1	2	2	2	2	1	2	2	2	1	2	2	2	2	2	2	2	1	1	1	1	1	1	2	2	2	1	3	3	2	1	1	1	1
106	46	2	1	4	3	7	1	2	2	2	2	2	2	2	1	2	1	2	2	2	1	2	1	2	2	2	2	2	2	2	2	2	1	1	1	1	2	2	2	2	2	2	1	1	2	1	1	2	1
107	53	2	1	3	4	8	1	2	2	2	2	2	2	2	2	1	1	2	2	2	1	2	1	2	2	2	2	2	2	2	2	2	1	1	1	1	1	1	2	1	2	1	3	3	2	2	1	1	1
108	58	2	1	3	2	12	7	2	2	2	2	2	2	1	2	2	2	2	2	2	1	2	2	2	1	2	2	2	2	2	2	2	3	1	1	1	2	1	1	2	2	1	3	1	2	1	1	1	1
109	34	2	1	3	2	5	1	2	2	2	2	2	2	1	2	2	1	1	2	2	1	2	1	2	2	2	2	2	2	2	2	2	3	1	1	1	1	1	2	2	1	1	3	1	2	1	1	1	1
110	47	2	1	3	3	9	1	2	2	3	3	2	2	2	2	1	2	2	2	2	1	2	2	2	2	2	2	2	2	2	2	2	1	1	1	1	2	1	2	2	2	1	1	1	2	2	1	1	1
111	21	2	1	4	5	0	5	2	2	2	2	2	1	1	2	1	1	2	2	2	1	2	1	1	1	2	2	2	2	2	2	2	1	1	1	1	1	1	2	1	2	1	3	3	2	1	1	1	1
112	51	2	1	4	4	12	1	2	2	2	2	2	1	1	1	2	1	1	1	1	1	2	1	2	2	2	2	2	2	2	2	2	1	1	1	1	1	1	1	1	1	1	1	1	2	1	1	1	1
113	48	2	1	3	4	16	1	2	2	2	2	2	1	1	1	1	1	1	2	1	1	1	1	1	1	2	2	2	2	2	2	2	3	1	1	1	1	1	1	1	1	1	1	1	2	1	1	1	1
114	39	2	1	3	3	23	1	2	2	2	2	2	2	1	2	1	1	1	2	1	1	2	1	2	2	2	2	2	2	2	2	2	1	1	1	1	1	1	2	1	1	1	3	3	2	1	1	1	1
115	61	2	1	3	2	16	#NULL!	2	2	2	2	2	2	1	2	1	1	2	2	1	1	2	2	2	2	2	2	2	2	2	2	2	1	1	1	1	1	1	2	1	1	1	3	1	2	1	1	1	1
116	64	2	1	2	4	15	1	2	2	2	3	#NULL!	#NULL!	#NULL!	#NULL!	#NULL!	#NULL!	#NULL!	#NULL!	#NULL!	1	2	2	2	2	2	2	2	2	2	2	2	1	#NULL!	1	1	1	1	2	2	2	1	1	1	2	1	2	2	1
117	27	1	1	3	4	9	1	2	2	2	2	2	2	1	1	1	1	2	2	2	1	2	1	2	2	2	2	2	2	2	2	2	3	1	1	1	2	1	2	2	2	1	1	1	2	1	1	1	1
118	32	2	1	3	2	2	1	2	2	2	2	2	2	1	1	1	2	1	2	2	1	2	1	2	2	2	2	2	2	2	2	2	3	1	1	1	1	1	2	2	2	1	3	3	2	1	1	1	1
119	51	2	1	3	4	5	1	2	2	2	2	2	1	1	1	1	1	2	2	1	1	2	1	2	1	2	2	2	2	2	2	2	2	2	1	1	1	1	2	1	1	1	1	1	2	1	1	1	1
120	39	1	1	5	4	16	1	2	2	2	2	2	1	1	1	2	1	2	2	2	1	2	1	2	2	2	2	2	2	2	2	2	1	1	1	1	1	1	1	2	2	1	3	1	2	1	1	2	1
121	47	2	1	3	4	#NULL!	1	2	2	2	2	2	1	2	2	1	2	2	2	2	1	2	1	1	2	2	2	2	2	2	2	2	3	#NULL!	1	1	1	1	2	2	2	2	2	1	2	1	1	1	1
122	31	2	1	3	5	7	1	2	2	2	2	2	1	1	1	1	1	2	2	2	1	2	2	2	2	2	2	2	2	2	2	2	1	1	1	1	1	1	2	2	2	1	3	1	2	1	1	1	1
123	44	2	1	3	3	17	3.4	2	2	2	2	2	1	1	1	1	1	1	1	1	1	2	1	2	1	2	2	2	2	2	2	2	1	1	1	1	1	1	2	2	2	1	1	3	2	1	1	1	1
124	35	2	1	3	5	3	1	2	2	2	3	2	2	2	2	1	1	1	2	2	1	2	2	2	2	2	2	2	2	2	2	2	1	1	1	1	1	1	2	2	2	1	1	1	2	2	1	1	1
125	62	1	1	3	1	17	1	2	2	2	2	2	1	1	2	1	1	1	2	2	1	2	1	2	2	2	2	2	2	2	2	2	1	1	1	1	1	1	2	2	2	2	1	1	2	1	1	1	1
126	49	2	1	2	2	14	1	2	2	2	2	2	1	1	2	1	1	1	1	1	1	2	1	1	1	2	2	1	2	2	2	2	3	1	1	1	1	1	2	2	2	1	1	1	2	1	1	1	1
127	48	1	1	3	3	2	#NULL!	2	2	2	2	2	2	2	2	2	1	1	2	2	1	2	2	2	2	2	2	2	2	2	2	2	3	2	1	1	1	1	2	2	2	1	1	1	2	1	1	1	1
128	49	2	1	3	2	2	1	2	2	2	2	2	2	1	1	1	1	2	2	2	1	2	2	2	1	2	2	2	2	2	2	2	1	#NULL!	1	1	1	1	2	2	2	2	3	3	2	1	1	1	1
129	71	2	1	3	3	25	1	2	2	2	2	2	1	1	1	1	1	1	1	1	1	2	2	2	2	2	2	1	1	2	2	2	1	1	1	1	1	1	1	1	2	1	2	1	2	1	1	1	1
130	34	1	1	5	4	10	1	2	2	2	2	2	2	1	2	1	1	2	2	2	1	2	1	2	2	2	2	2	2	2	2	2	3	1	1	1	2	1	2	2	2	2	3	3	2	1	1	1	1
131	35	2	1	4	4	8	1	2	2	2	3	2	1	1	2	2	1	2	2	2	1	2	1	2	2	2	2	2	2	2	2	2	3	1	1	1	1	1	2	2	2	1	3	3	2	1	1	1	1
132	32	2	1	3	2	14	7	2	2	2	2	2	2	1	2	2	1	1	2	1	1	2	1	1	2	2	2	2	2	2	2	2	1	1	1	1	2	1	2	2	2	2	1	1	2	1	1	1	1
133	26	2	1	3	3	7	1	2	2	2	2	2	1	1	2	1	1	1	1	1	1	2	2	1	1	2	2	2	2	2	2	2	1	1	1	1	1	1	2	1	2	1	2	1	2	2	1	1	1
134	52	2	1	#NULL!	#NULL!	#NULL!	#NULL!	2	2	2	3	#NULL!	#NULL!	#NULL!	#NULL!	#NULL!	#NULL!	#NULL!	#NULL!	#NULL!	1	2	2	2	2	2	2	2	2	2	2	2	3	1	1	1	1	2	2	1	2	1	3	3	#NULL!	#NULL!	#NULL!	#NULL!	#NULL!
135	30	2	1	3	4	#NULL!	1	2	2	2	2	2	2	1	1	2	2	1	2	2	1	2	1	2	2	2	2	2	2	2	2	2	3	1	1	1	2	1	1	2	2	1	3	3	2	2	1	2	1
136	39	2	2	3	3	1.75	1	2	2	2	1	2	1	1	1	1	1	1	1	2	1	2	2	2	2	2	2	2	2	2	2	2	1	1	1	1	1	1	1	1	1	1	1	1	2	1	1	1	1
137	35	1	1	3	1	6	1	2	2	2	1	2	1	1	1	1	1	1	2	2	1	2	1	2	2	2	2	1	2	2	2	2	1	1	1	1	1	1	2	2	2	1	3	3	2	1	1	1	1
138	28	2	1	3	1	10	1	2	2	2	2	2	1	2	2	2	2	2	2	2	1	2	2	2	2	2	2	2	2	2	2	2	1	1	1	1	1	2	2	2	2	2	2	1	2	1	1	2	1
139	70	2	1	3	2	#NULL!	3	2	2	2	2	2	1	1	2	1	2	1	2	1	1	2	1	2	2	2	2	2	1	2	2	2	1	2	1	1	1	1	2	2	2	2	1	1	2	2	1	1	1
140	73	2	1	3	2	#NULL!	1	2	2	2	2	2	1	1	1	1	1	1	1	1	1	1	2	2	1	2	2	1	2	2	2	2	3	#NULL!	1	1	1	1	1	1	2	1	3	3	2	1	1	1	1
141	54	2	1	4	3	2	1	2	2	2	2	2	1	1	2	1	1	1	2	2	1	2	1	2	2	2	2	1	2	2	2	2	2	2	1	1	1	1	2	2	2	1	3	1	2	1	1	1	1
142	61	2	1	5	1	16	5	2	2	2	2	2	2	1	2	1	1	1	2	1	1	1	1	2	2	2	2	1	2	2	2	2	1	1	1	1	1	1	2	2	2	1	3	1	2	1	1	1	1
143	70	2	1	3	2	10	1	2	2	2	2	2	1	1	1	1	1	1	2	2	1	1	1	2	1	2	2	2	2	2	2	2	2	1	1	1	1	1	2	2	2	1	2	1	2	1	1	1	1
144	61	2	1	3	2	13	6	2	2	2	2	2	1	2	2	2	1	1	2	2	1	2	2	1	1	2	2	2	2	2	2	2	1	1	1	1	1	1	2	1	2	1	3	1	2	1	1	1	1
145	54	2	1	3	5	10	7	2	2	2	2	2	1	1	2	1	1	1	2	1	1	2	1	1	2	2	2	2	2	2	2	2	2	1	1	1	1	1	2	1	1	1	1	1	2	1	1	1	1
146	61	2	1	5	3	9	2	2	2	2	2	2	1	1	2	1	1	1	2	2	1	2	2	2	2	2	2	1	2	2	2	1	3	1	1	1	1	1	2	2	2	1	1	1	2	1	1	1	1
147	42	2	1	4	3	2	5	2	2	2	2	2	2	1	2	2	1	2	2	2	1	2	1	1	2	2	2	2	2	2	2	2	3	1	1	1	1	1	1	1	1	1	1	1	2	1	1	1	1
148	37	2	1	4	3	18	1	2	2	2	2	2	2	1	1	1	2	2	2	2	1	2	1	2	1	2	2	2	2	2	2	2	1	1	1	1	1	2	2	2	2	1	3	3	2	1	1	1	1
149	52	2	1	3	3	2	3.4	2	2	3	2	2	2	1	2	2	1	2	2	2	1	1	2	2	1	2	2	2	2	2	2	2	1	1	1	1	1	1	1	1	1	1	3	3	1	1	1	1	1
150	54	2	1	3	2	1	5	2	2	2	2	2	1	1	2	1	1	1	1	1	1	2	1	2	2	2	2	2	2	2	2	2	3	1	1	1	1	1	1	1	1	1	3	3	2	1	1	1	1
151	54	2	1	2	2	10	1	2	2	2	2	2	1	1	2	1	1	2	2	2	1	2	1	1	2	2	2	2	2	2	2	2	3	1	1	1	1	1	2	2	2	1	3	2	2	1	1	2	1
152	19	2	1	3	5	1	#NULL!	2	2	2	2	2	1	1	2	1	2	1	1	2	1	2	1	1	2	2	2	2	2	2	2	2	2	1	1	1	2	1	1	2	2	1	1	1	2	1	1	1	1
153	54	2	1	4	2	0.25	1	2	2	2	2	2	2	1	2	1	1	1	1	2	1	2	2	1	2	2	2	2	2	2	2	2	3	1	1	1	1	1	2	1	1	1	1	1	2	1	1	1	1
154	53	2	1	3	2	8	1	2	2	2	1	2	1	1	2	2	1	1	1	1	1	2	2	2	1	2	2	1	2	2	2	2	1	2	1	1	1	1	2	2	2	1	1	1	2	2	1	1	1
155	46	2	1	4	5	1	1	2	2	2	2	2	2	1	2	2	1	1	2	2	1	1	1	1	1	2	2	2	2	2	2	2	3	1	1	1	1	1	1	1	2	1	3	3	2	1	1	1	2
156	66	2	1	4	2	0	7	2	2	2	2	2	1	1	2	2	1	1	2	2	1	2	1	2	2	2	2	2	2	2	2	2	1	1	1	1	2	1	2	1	2	1	2	1	2	1	1	1	1
157	27	2	1	3	2	9	1	2	2	2	2	2	2	1	1	1	1	1	2	1	1	2	2	2	2	2	2	2	2	2	2	2	1	1	1	1	1	1	2	2	2	1	3	3	2	1	1	1	1
158	60	1	1	3	1	5	3	2	2	2	2	2	1	1	1	1	1	1	1	2	2	2	1	2	1	2	2	1	2	2	2	2	1	1	1	1	2	1	2	2	1	1	1	1	2	1	1	1	1
159	50	2	1	4	2	3	7	1	2	2	1	2	1	1	1	1	1	1	1	1	1	2	1	2	2	2	2	1	1	2	2	2	1	1	1	1	1	1	2	2	2	1	2	2	2	1	1	1	1
160	54	2	1	3	3	18	5	2	2	2	2	2	2	1	2	2	2	2	2	2	1	2	2	2	2	2	2	2	2	2	2	2	1	1	1	1	1	1	2	1	2	2	3	3	2	1	1	1	1
161	56	2	1	4	2	10	1	2	2	2	2	2	1	1	2	2	2	2	2	2	1	2	2	2	2	2	2	2	2	2	2	2	1	1	1	1	1	1	1	1	1	1	2	1	2	1	1	1	1
162	51	2	1	4	3	2	#NULL!	1	2	3	2	2	1	2	2	2	2	2	2	2	1	2	2	2	2	2	2	2	2	2	2	2	2	1	2	1	1	2	2	2	2	2	2	1	2	1	1	2	1
163	50	1	1	4	4	15	1	1	2	2	2	2	1	1	2	2	2	2	2	1	1	2	1	2	1	2	2	2	2	2	2	2	3	1	1	1	1	1	2	2	2	2	1	1	2	1	1	2	1
164	47	2	1	3	4	8	1	2	2	2	2	2	2	1	1	1	1	1	2	1	1	2	1	1	1	2	2	2	2	2	2	2	1	1	1	1	1	1	2	1	1	1	3	3	2	1	1	1	1
165	30	2	1	3	1	6	1	2	2	2	2	2	2	2	2	2	1	2	2	2	1	2	2	2	2	2	2	2	2	2	2	2	3	1	1	1	2	1	2	2	2	1	3	1	2	1	1	1	1
166	42	2	1	3	2	1	1	2	2	2	2	2	1	1	1	1	1	1	2	1	1	2	1	2	2	1	2	2	2	2	2	2	1	1	1	1	2	1	2	2	2	2	2	1	2	1	1	1	1
167	48	2	1	4	2	11	1	1	2	2	2	2	1	1	1	1	1	1	2	2	1	2	1	1	1	1	2	1	2	2	2	2	2	1	1	1	1	1	2	1	1	1	1	1	2	1	1	1	1
168	41	2	1	3	3	6	1	2	2	2	2	2	1	1	1	1	1	1	2	1	1	2	1	2	2	2	2	1	2	2	2	2	3	1	1	1	1	1	2	1	1	1	3	1	2	1	1	1	1
169	24	2	1	3	4	#NULL!	1	2	2	2	2	2	1	1	1	1	1	1	1	1	1	2	1	2	2	2	2	2	2	2	2	2	1	1	1	1	1	1	2	1	2	1	1	1	2	1	1	1	1
170	46	2	1	4	2	#NULL!	1	2	2	2	2	2	1	1	2	1	1	2	2	2	1	2	1	2	1	2	2	2	2	2	2	2	1	1	1	1	1	1	2	2	2	1	3	3	2	1	1	1	1
171	48	1	1	5	4	13	1	2	2	2	2	2	1	1	1	1	1	2	2	2	1	1	1	1	1	2	2	1	2	2	2	2	2	1	1	1	1	1	1	1	2	1	3	3	2	1	1	1	1
172	60	2	1	5	3	10	3	2	2	2	2	2	1	1	1	1	1	1	1	1	1	2	1	2	1	2	2	2	2	2	2	2	1	1	1	1	2	1	2	2	2	1	3	3	2	1	1	1	1
173	27	2	1	3	1	9	1	2	2	2	2	2	2	2	2	2	1	1	2	2	1	2	1	2	2	2	2	1	2	2	2	2	3	1	1	1	1	1	2	1	1	2	1	2	2	1	1	1	1
174	48	1	1	4	5	9	1	2	2	2	2	2	2	1	2	1	1	1	2	1	1	2	1	1	2	2	2	2	2	2	2	2	1	1	1	1	1	1	2	2	2	1	1	1	2	1	1	1	1
175	58	2	1	3	3	15	1	2	2	2	2	2	1	1	1	1	1	1	2	2	1	2	1	2	1	2	2	1	2	2	2	2	3	1	1	1	1	1	2	2	2	1	3	3	2	1	1	1	1
176	33	2	1	4	4	3	1	2	2	2	3	2	2	1	2	2	1	1	2	1	1	2	1	2	1	2	2	2	2	2	2	2	1	1	1	1	1	1	2	2	2	1	1	1	2	1	1	1	1
177	45	2	1	3	3	8	4.9	2	2	2	2	2	1	1	2	1	1	1	2	2	1	2	1	2	2	2	2	2	2	2	2	2	3	1	1	1	1	1	1	1	1	1	3	3	2	1	1	1	1
178	67	2	1	3	6	2.5	7	2	2	2	2	2	1	1	1	1	1	1	2	1	1	2	1	2	1	2	2	1	2	2	2	2	1	#NULL!	1	1	2	1	2	2	2	1	3	3	2	1	1	1	2
179	51	2	1	3	5	15	4.5	2	2	2	2	2	1	1	2	1	1	1	2	2	1	2	1	2	2	2	2	2	2	2	2	1	1	1	1	1	1	1	2	1	2	1	3	3	2	1	1	1	1
180	45	2	1	4	6	20	1	2	2	2	2	1	2	2	2	2	2	2	2	2	1	2	1	2	2	2	2	2	2	2	2	2	3	1	1	1	1	1	1	1	2	1	1	1	1	1	1	1	1
181	41	2	1	3	5	10	1	2	2	2	2	1	2	2	2	2	2	2	2	2	1	2	1	2	2	2	2	2	2	2	2	2	3	2	1	1	1	1	2	2	2	2	1	1	1	1	1	1	1
182	61	2	1	3	1	10	1	2	2	2	2	2	1	1	1	2	1	2	2	2	2	2	1	1	1	2	2	2	2	2	2	2	1	1	1	1	1	1	2	2	2	2	1	1	2	1	1	1	1
183	57	2	1	3	3	15	1	2	2	2	2	2	1	1	2	2	2	2	2	2	1	2	1	2	1	2	2	2	2	2	2	2	1	1	1	1	1	1	2	2	1	1	1	1	2	1	1	1	1
184	51	2	1	3	2	10	3	2	2	2	2	2	1	1	2	2	1	1	2	1	1	2	2	1	2	2	2	2	2	2	2	2	2	2	1	1	2	1	1	1	2	1	1	1	2	1	1	1	1
185	64	2	1	2	5	14	1	2	2	2	2	2	2	2	2	1	1	2	2	2	1	2	2	1	1	2	2	2	2	2	2	2	2	1	1	1	2	1	1	1	2	1	1	1	2	1	1	1	1
186	33	2	1	3	2	14	5	2	2	2	2	2	2	1	2	1	2	1	2	1	1	2	1	2	2	2	2	2	2	2	2	2	1	#NULL!	1	1	1	1	2	1	2	1	3	3	2	1	2	1	1
187	63	2	1	2	6	12	5	2	2	2	2	2	1	1	1	2	2	2	2	2	1	2	2	1	1	2	2	2	2	2	2	2	3	1	1	1	1	1	2	2	2	1	1	1	2	1	1	1	1
188	24	2	1	3	6	4	1	2	2	2	2	2	1	1	2	2	1	2	2	2	1	1	1	1	1	2	2	2	2	2	2	2	1	1	1	1	1	2	2	2	2	1	3	3	2	1	1	2	1
189	38	2	1	4	4	5	1	2	2	2	2	1	2	2	2	2	2	2	2	2	1	2	2	2	2	2	2	2	2	2	2	2	1	1	1	1	1	1	2	1	2	2	3	3	2	1	1	1	1
190	51	2	1	3	4	#NULL!	1	2	2	2	2	2	2	1	2	1	1	1	2	1	1	1	1	2	2	2	2	2	2	2	2	2	1	1	1	1	1	1	2	1	2	1	1	1	2	1	1	1	1
191	48	2	1	3	6	2	5	2	2	2	2	2	1	1	1	2	1	1	2	1	1	2	1	1	1	2	2	2	2	2	2	2	3	2	1	1	2	1	1	1	1	1	3	3	2	1	1	1	1
192	51	2	1	3	2	14	7	2	2	2	2	2	2	1	2	1	1	1	2	2	1	2	2	2	2	2	2	2	2	2	2	2	2	1	1	1	1	1	1	1	2	1	3	1	2	1	1	2	1
193	60	2	1	3	3	20	1	2	2	2	3	2	1	2	2	2	1	1	2	2	1	2	2	2	1	2	2	2	2	2	2	2	2	1	1	1	2	1	1	1	2	1	1	1	2	1	1	1	1
194	54	1	1	3	2	10	1	2	2	2	2	2	1	1	1	1	1	2	2	2	1	2	1	2	1	2	2	2	2	2	2	2	1	1	1	1	1	1	2	2	2	2	1	1	2	1	1	1	1
195	57	2	1	4	2	#NULL!	3	2	2	2	2	2	1	2	1	2	2	1	2	2	2	1	1	2	2	2	2	2	2	2	2	2	2	2	1	1	1	2	2	1	2	1	3	2	2	1	1	2	1
196	53	2	1	4	2	#NULL!	1	2	2	2	2	2	1	1	1	1	1	1	1	1	1	2	1	2	2	2	2	2	2	2	2	2	1	#NULL!	1	1	1	1	1	2	2	1	3	3	2	1	1	1	1
197	48	2	1	4	2	1	5	2	2	2	2	2	1	1	2	1	2	1	2	2	2	2	1	2	2	2	2	1	2	2	2	1	1	1	1	1	1	1	1	1	2	1	1	1	2	1	1	1	1
198	24	2	1	5	4	2	7	2	2	2	3	2	1	1	2	1	1	2	2	2	1	2	1	2	2	2	2	2	2	2	2	2	1	1	1	1	1	1	2	2	1	1	3	3	2	2	1	2	1
199	34	2	1	3	4	13	1	2	2	2	2	2	1	1	1	1	1	1	1	1	1	2	1	2	2	2	2	2	2	2	2	2	3	1	1	1	1	1	2	1	2	1	1	1	2	1	1	1	1
200	43	2	1	4	2	1	1	2	2	2	3	2	1	1	1	1	1	1	2	2	1	2	2	2	1	2	2	2	2	2	2	2	1	1	1	1	1	1	2	1	2	1	1	1	2	1	1	1	1
201	63	2	1	3	3	#NULL!	1	2	2	2	2	2	1	1	2	2	2	2	2	2	1	2	2	1	1	2	2	2	2	2	2	2	3	1	1	1	1	1	2	2	2	1	3	3	2	1	1	1	1
202	60	2	1	4	5	2	1	2	2	2	2	2	1	1	2	2	1	1	2	2	1	1	1	2	2	2	2	2	2	2	2	2	1	1	1	1	1	1	2	1	2	1	1	1	2	1	1	1	1
203	69	2	1	3	6	16	5	2	2	2	2	1	2	1	1	1	2	2	2	2	1	2	1	1	1	2	2	2	2	2	2	2	3	1	1	1	1	1	2	2	2	1	3	3	2	1	1	1	1
204	36	1	1	5	3	4	5	2	2	2	2	2	2	2	2	1	2	1	2	2	1	2	1	2	1	2	2	2	2	2	2	2	1	1	1	1	1	1	2	2	2	1	3	3	2	1	1	1	1
205	30	2	1	3	4	1	1	2	2	2	2	2	1	1	1	1	1	1	2	2	1	2	1	1	2	2	2	2	2	2	2	2	2	1	1	1	1	1	2	1	1	1	3	1	2	1	1	1	1
206	43	1	1	3	2	3.5	1	2	2	2	2	2	1	1	1	1	1	1	1	1	1	2	1	2	1	2	2	2	1	2	2	2	1	1	1	1	1	1	2	2	2	1	1	1	2	1	1	1	1
207	57	1	1	5	5	35	7	2	2	2	2	2	1	1	2	2	1	1	2	2	1	2	1	2	2	2	2	2	2	2	2	2	1	1	1	1	1	1	1	1	2	1	1	1	2	1	1	1	1
208	63	1	1	3	1	0.5	1	2	2	2	2	2	1	1	1	1	1	1	2	1	1	2	1	2	2	2	2	2	2	2	2	2	1	1	1	1	2	1	2	2	2	1	1	1	2	1	1	1	1
209	68	2	1	3	6	1	7	2	2	2	2	2	1	1	1	1	1	1	1	1	1	2	1	1	1	2	2	1	1	2	2	2	3	1	1	1	1	1	1	1	2	1	1	1	2	1	1	1	1
210	34	1	1	5	1	1	7	2	2	2	2	2	2	2	2	2	1	2	2	2	2	2	1	2	2	2	2	2	2	2	2	2	1	1	1	1	1	1	2	2	2	1	1	1	2	1	2	1	1
211	58	2	1	2	3	8	1	2	2	2	1	2	1	1	2	1	1	1	1	1	1	2	1	2	2	2	2	1	2	2	2	2	1	1	1	1	1	1	1	1	2	1	1	1	2	1	1	1	1
212	35	1	1	3	4	13	1	2	2	2	2	2	1	1	1	1	2	2	2	1	1	1	1	1	1	2	2	2	2	2	2	2	1	1	1	1	2	1	2	2	2	2	3	3	2	1	1	1	1
213	35	1	1	4	5	15	1	1	2	2	2	#NULL!	#NULL!	#NULL!	#NULL!	#NULL!	#NULL!	#NULL!	#NULL!	#NULL!	1	2	2	2	2	2	2	2	2	2	2	2	1	1	1	1	2	1	2	2	2	1	3	3	2	1	2	2	2
214	41	2	1	3	2	8	1	2	2	2	2	2	1	1	1	1	1	1	2	2	1	2	2	1	1	2	2	2	2	2	2	2	3	1	1	1	1	1	1	1	2	1	3	1	2	1	1	2	1
215	26	2	1	3	2	8	1	2	2	2	2	2	1	2	2	2	1	2	2	2	1	2	1	2	2	2	2	2	2	2	2	2	1	1	1	1	2	1	2	2	2	2	3	3	2	2	2	2	1
216	41	1	1	3	2	2	1	2	2	2	2	2	1	2	2	2	2	2	2	2	1	2	2	2	1	2	2	2	2	2	2	2	2	1	1	1	1	1	1	1	1	1	3	3	2	1	1	1	1
217	52	2	1	3	2	0.5	3	2	2	2	2	2	2	2	2	1	2	2	2	2	1	2	2	2	1	2	2	2	2	2	2	2	3	1	1	1	1	1	2	1	2	1	2	2	2	1	1	1	1
218	35	1	2	5	1	#NULL!	1	2	2	2	1	1	2	2	2	2	2	2	2	2	1	2	1	2	2	2	2	2	2	2	2	2	1	1	1	1	1	1	1	1	2	2	2	1	2	2	1	1	1
219	32	2	1	3	2	14	1	2	2	2	2	2	2	1	1	2	1	2	2	2	1	2	1	2	2	2	2	2	2	2	2	2	3	1	1	1	1	1	2	2	2	2	1	1	2	1	1	1	1
220	34	2	1	4	4	7	1	2	2	2	2	2	1	1	1	1	1	1	1	1	1	2	1	2	2	2	2	2	2	2	2	2	1	1	1	1	1	1	2	1	2	1	1	1	2	1	1	1	1
221	21	2	2	4	1	#NULL!	1	2	2	2	3	#NULL!	#NULL!	#NULL!	#NULL!	#NULL!	#NULL!	#NULL!	#NULL!	#NULL!	#NULL!	#NULL!	#NULL!	#NULL!	#NULL!	#NULL!	#NULL!	#NULL!	#NULL!	#NULL!	#NULL!	#NULL!	3	#NULL!	#NULL!	#NULL!	#NULL!	#NULL!	#NULL!	#NULL!	#NULL!	#NULL!	3	3	#NULL!	#NULL!	#NULL!	#NULL!	#NULL!
222	33	2	1	4	2	13	3.9	2	2	2	2	2	1	1	1	1	1	1	2	1	1	2	1	1	1	2	2	2	2	2	2	2	1	1	1	1	1	1	1	1	1	1	1	1	2	1	1	1	1
223	28	1	1	3	4	10	1	2	2	2	2	2	1	1	1	2	2	1	2	2	1	2	1	2	2	2	2	2	2	2	2	2	3	1	1	1	1	1	2	2	2	1	3	3	2	1	1	1	1
224	30	2	2	6	2	5	1	2	2	2	2	2	1	2	1	2	2	1	1	1	1	2	1	2	2	2	2	2	2	2	2	2	1	1	1	1	1	1	2	1	1	1	3	2	2	1	1	1	1
225	75	2	1	3	3	#NULL!	3	2	2	2	2	2	2	2	2	2	1	2	2	2	1	2	2	2	2	2	2	2	2	2	2	2	1	1	1	1	1	1	1	1	2	1	3	3	2	1	1	1	1
226	43	2	1	3	5	4	1	2	2	2	3	2	1	2	2	1	2	2	2	2	1	2	2	2	1	2	2	2	2	2	2	2	1	1	1	1	2	1	2	1	2	1	3	3	1	1	1	1	1
227	23	2	1	5	4	1	1	2	2	2	2	2	2	1	1	1	1	1	2	1	1	2	1	1	2	2	2	1	1	2	2	2	3	1	1	1	1	1	2	1	1	1	3	3	2	1	1	1	1
228	30	1	1	5	3	5	1	2	2	2	2	2	1	1	1	2	1	1	2	1	1	2	1	1	1	2	2	1	2	2	2	2	2	1	1	1	1	1	2	2	2	1	1	1	2	1	1	1	1
229	22	2	1	3	5	#NULL!	1	2	2	2	2	2	2	2	2	2	1	1	2	1	1	2	1	1	1	2	2	2	2	2	2	2	1	1	1	1	1	1	2	2	2	2	3	3	2	2	1	1	1
230	46	2	1	3	6	6	1	2	2	2	1	2	1	1	2	1	2	2	2	2	1	2	2	2	2	2	2	2	2	2	2	2	1	1	1	1	2	1	2	2	2	2	1	1	2	1	1	2	1
231	49	2	1	3	2	0.3	1	2	2	2	3	1	2	2	2	2	2	2	2	2	1	2	2	2	2	2	2	2	2	2	2	2	1	2	1	1	1	1	2	1	2	1	3	3	2	1	1	2	1
232	30	1	1	5	4	8	1	2	2	2	2	2	2	2	1	2	2	1	2	2	1	2	1	2	2	2	2	2	2	2	2	2	1	1	1	1	1	1	2	2	2	1	3	1	2	1	1	2	1
233	28	2	2	4	1	5	1	2	2	2	2	2	1	2	2	2	2	2	2	2	1	2	1	2	2	2	2	2	2	2	2	2	1	1	1	1	1	1	2	2	2	1	3	1	2	1	1	1	1
234	31	2	1	3	4	2	1	2	2	2	2	2	1	1	2	2	1	2	2	2	1	2	2	2	2	2	2	2	2	2	2	2	1	1	1	1	1	1	1	1	2	1	1	1	2	1	1	1	1
235	62	1	1	5	3	30	1	2	2	2	3	2	1	2	1	1	1	1	2	1	1	2	1	2	2	2	2	2	2	2	2	2	3	1	1	1	1	1	2	1	2	1	1	1	2	1	1	1	1
236	20	2	1	5	6	3	7	2	2	2	3	2	2	1	1	2	1	2	2	2	1	2	1	2	2	2	2	2	2	2	2	2	3	1	1	1	1	1	1	2	2	2	1	1	2	1	1	1	1
237	37	2	1	4	5	#NULL!	1	2	2	2	2	2	2	2	2	1	1	1	2	2	1	2	1	1	1	2	2	1	2	2	2	1	3	1	1	1	1	1	2	1	1	1	1	1	2	1	1	1	1
238	18	2	1	3	4	0.2	1	2	2	2	3	2	1	1	1	2	2	2	2	2	1	2	1	2	2	2	2	2	2	2	2	2	3	1	1	2	2	1	2	2	2	1	1	1	2	2	1	2	2
239	20	2	1	4	3	3	1	2	2	2	2	2	1	1	2	2	1	2	2	2	1	2	1	2	2	2	2	2	2	2	2	2	1	2	1	1	1	1	2	2	2	1	1	1	2	2	1	1	1
240	57	2	1	3	4	7	1	2	2	2	3	2	1	1	2	1	1	1	2	1	1	2	1	1	2	2	2	1	2	2	2	2	1	1	1	1	1	1	1	1	1	1	1	1	2	1	1	1	1
241	27	2	1	4	4	7	1	2	2	2	2	2	1	1	2	2	1	2	2	2	1	2	1	2	2	2	2	2	2	2	2	2	2	2	1	1	1	1	2	2	2	1	3	3	2	1	2	1	1
242	22	2	1	3	4	4	1	2	2	2	2	2	2	1	1	2	1	1	1	1	1	2	2	2	1	2	2	2	2	2	2	2	3	2	1	1	2	1	2	2	1	2	3	1	2	1	1	1	1
243	52	2	1	3	6	5	7	2	2	2	3	1	2	2	2	2	1	2	2	2	1	1	2	1	1	2	2	2	2	2	2	2	3	#NULL!	1	1	1	1	2	2	2	2	3	3	1	1	1	1	1
244	26	2	1	3	2	8	7	2	2	2	2	2	1	1	1	1	1	1	1	1	1	1	1	2	1	2	2	2	2	2	2	2	3	1	1	1	1	1	2	1	2	1	2	3	2	1	1	1	1
245	27	1	2	6	2	3	1	2	2	2	1	2	1	1	2	2	1	2	2	2	1	2	1	2	2	2	2	2	2	2	2	2	3	2	1	1	1	1	2	2	2	1	3	3	2	1	2	1	1
246	18	2	1	3	4	1	1	2	2	2	2	2	2	1	2	2	2	2	2	2	1	2	2	2	2	2	2	2	2	2	2	2	1	1	1	1	2	2	2	2	2	2	3	3	2	1	1	1	1
247	24	2	1	3	5	6	1	2	2	2	2	2	2	1	2	1	1	2	2	1	1	2	1	1	1	2	2	2	2	2	2	2	1	2	1	1	1	1	2	2	2	2	1	1	2	1	1	1	1
248	65	2	1	5	5	16	4	2	2	2	2	2	1	2	1	1	2	2	2	2	1	2	2	2	2	2	2	2	2	2	2	2	1	1	1	1	1	1	1	1	2	1	3	3	2	1	1	1	1
249	29	2	2	5	1	3.5	1	2	2	2	1	2	1	2	2	2	2	2	2	1	1	2	1	1	2	2	2	2	2	2	2	2	1	2	1	1	1	1	2	2	2	2	3	3	2	1	1	2	1
250	32	1	1	5	3	9	1	2	2	2	1	2	1	1	2	1	1	1	1	1	1	2	1	2	2	2	2	2	2	2	2	2	2	1	1	1	2	1	2	2	2	1	2	1	2	1	1	1	1
251	54	2	1	3	3	5	1	2	2	2	2	2	1	1	2	1	2	2	2	2	1	2	1	1	2	2	2	2	2	2	2	2	1	#NULL!	1	1	1	1	1	1	2	1	3	1	2	2	1	1	1
252	28	2	2	5	2	1	1	2	2	2	2	2	1	1	1	1	2	2	2	2	1	2	1	2	2	2	2	2	2	2	2	2	1	1	1	1	1	1	1	2	2	1	1	1	2	1	1	2	1
253	21	2	1	3	4	3	1	2	2	2	2	2	1	1	1	2	1	1	2	1	1	2	1	2	2	2	2	2	2	2	2	2	1	1	1	1	1	1	2	2	2	1	1	1	2	1	1	1	1
254	45	1	1	5	2	6	1	2	2	2	2	2	2	2	1	2	1	2	2	2	1	2	2	2	2	2	2	2	2	2	2	2	2	1	1	1	2	2	2	2	2	1	1	1	2	2	1	1	1
255	22	2	2	4	1	1	1	2	2	2	1	2	1	1	1	2	1	1	2	1	1	2	1	1	1	2	2	2	2	2	2	2	1	1	1	1	1	1	1	1	2	1	1	3	1	1	1	1	1
256	27	2	2	#NULL!	1	4	1	2	2	2	1	2	1	1	1	1	1	1	1	1	1	2	1	1	1	2	2	2	1	2	2	2	1	#NULL!	1	1	1	1	1	1	1	1	3	3	1	1	1	1	1
257	56	2	1	5	4	7	6	2	2	2	1	2	1	1	1	1	1	1	1	1	1	2	1	2	2	2	2	2	2	2	2	2	1	2	1	1	1	1	1	1	2	1	1	1	1	1	1	1	1
258	27	2	2	6	3	3	1	2	2	2	1	2	1	1	2	2	1	2	2	2	1	2	1	2	2	2	2	2	2	2	2	2	3	2	1	1	1	1	2	2	2	1	3	3	2	1	2	1	1
259	29	1	2	4	1	5	1	1	1	2	2	2	1	1	1	2	1	2	2	2	2	2	1	2	2	2	2	2	2	2	2	2	1	1	1	1	1	1	1	2	2	1	1	1	2	1	1	2	1
260	62	2	1	3	4	15	#NULL!	2	2	2	2	2	1	2	2	1	1	1	2	2	1	1	1	1	1	2	2	2	2	2	2	2	1	1	1	1	1	1	2	2	2	1	3	3	2	1	1	1	1
261	49	2	1	3	4	3	1	2	2	2	3	2	1	1	2	2	2	2	2	2	1	2	2	1	1	2	2	2	2	2	2	2	3	1	1	1	1	1	2	2	1	1	2	1	2	1	2	2	1
262	32	2	1	3	4	14	1	2	2	2	2	2	1	1	1	1	1	1	2	1	1	2	1	2	2	2	2	2	2	2	2	2	1	1	1	1	1	1	2	2	2	1	1	1	2	1	1	1	1
263	29	1	2	5	2	#NULL!	1	2	2	2	3	2	1	1	2	1	1	1	1	1	2	2	1	1	1	2	2	2	2	2	2	2	1	1	1	1	1	1	1	1	2	2	3	1	2	1	1	1	1
264	51	2	1	3	2	15	1	2	2	2	2	2	2	1	2	1	1	2	2	2	1	2	1	2	2	2	2	2	2	2	2	2	1	1	1	1	1	2	2	1	2	1	1	1	2	1	1	1	1
265	65	2	1	3	1	23	3	2	2	2	2	2	1	1	2	1	1	1	1	1	1	2	2	2	1	2	2	2	2	2	2	1	2	1	1	1	1	1	1	1	2	1	3	1	2	1	1	1	1
266	30	2	2	5	1	#NULL!	1	2	2	2	1	2	1	1	1	1	1	1	1	1	1	2	1	1	2	2	2	1	1	2	2	2	3	2	1	1	1	2	2	2	2	1	2	1	2	1	1	1	1
267	34	2	1	3	4	5	1	2	2	2	2	2	1	2	2	2	1	2	2	2	1	2	1	1	1	2	2	2	2	2	2	2	3	1	1	1	1	1	2	2	2	2	3	1	2	1	1	1	1
268	28	1	2	4	2	2	1	2	2	2	2	2	1	1	2	1	1	1	1	1	1	2	1	1	1	2	2	2	2	2	2	2	2	1	1	1	1	1	1	1	1	1	3	1	2	1	1	1	1
269	27	2	1	3	3	6	1	2	2	2	2	1	2	2	2	2	2	2	2	2	2	2	2	2	2	2	2	1	2	2	2	2	2	1	1	1	1	1	2	2	2	2	3	3	2	1	1	2	1
270	67	1	1	3	1	11	1	2	2	2	2	2	1	1	2	1	2	2	2	2	1	2	2	2	1	2	2	2	2	2	2	1	1	1	1	1	1	1	2	2	2	2	1	1	2	1	1	1	1
271	29	2	2	5	1	5	1	2	2	2	2	2	1	1	2	1	2	2	2	2	1	1	1	2	2	2	1	1	2	2	2	2	1	1	1	1	1	1	1	1	2	1	1	3	2	1	1	1	1
272	22	2	2	4	4	0.5	1	2	2	2	1	2	1	1	1	1	2	2	2	2	1	1	1	2	2	2	2	2	2	2	2	2	1	1	1	1	1	1	1	1	2	1	3	3	2	1	1	1	1
273	22	2	1	3	6	4	1	2	2	2	3	2	1	1	1	2	1	1	2	1	1	2	1	2	2	2	2	2	2	2	2	2	1	1	1	1	1	1	1	2	2	2	3	3	2	1	1	1	1
274	78	2	1	3	3	13	3	2	2	2	3	2	1	2	1	1	1	2	1	2	1	2	2	2	2	2	2	2	2	2	2	1	1	2	1	1	2	1	2	2	2	1	3	3	2	1	1	1	1
275	27	1	2	4	1	4	1	2	2	2	1	2	1	1	2	1	1	1	2	1	1	2	1	2	2	2	2	1	2	2	2	2	1	1	1	1	1	1	2	2	2	2	3	1	2	1	1	1	1
276	49	2	1	3	5	10	7	2	2	2	2	2	1	1	2	1	1	1	2	2	1	2	2	2	1	2	2	1	2	2	2	2	1	1	1	1	1	1	2	1	2	1	1	1	2	1	1	1	1
277	53	2	1	3	1	7	1	2	2	2	2	2	2	1	2	1	1	2	1	1	1	2	1	1	1	2	2	2	2	2	2	2	1	1	1	1	1	1	1	2	2	1	3	1	2	1	1	1	1
278	28	2	2	5	1	#NULL!	1	2	2	2	3	2	1	1	2	1	1	1	1	1	1	2	1	1	1	2	2	2	2	2	2	2	1	1	1	1	1	1	1	1	2	2	3	1	2	1	1	1	1
279	29	2	2	4	1	6	1	2	2	2	2	2	1	2	2	1	1	1	2	2	1	2	1	1	1	2	2	1	2	2	2	2	1	#NULL!	1	1	1	1	2	2	1	1	1	1	2	1	1	1	1
280	54	1	1	4	4	7	1	2	2	2	2	2	1	1	1	1	1	1	1	2	1	2	2	2	2	2	2	2	2	2	2	2	1	1	1	1	1	1	2	2	2	1	3	3	2	1	1	1	1
281	42	1	1	3	4	7	1	2	2	2	2	1	2	2	2	2	2	2	2	2	1	2	2	2	2	2	2	2	2	2	2	2	1	1	1	1	2	2	2	1	2	2	3	3	2	2	2	2	1
282	23	2	2	#NULL!	1	0.5	1	2	2	2	1	2	1	1	1	2	2	2	2	2	1	2	1	1	1	2	2	2	2	2	2	2	1	1	1	2	2	1	2	2	2	1	1	1	2	2	1	2	2
283	28	1	2	6	1	3	1	2	2	2	2	2	1	2	2	2	2	2	2	2	1	2	1	2	2	2	2	2	1	2	2	2	1	1	1	1	1	1	2	2	2	2	1	1	2	1	1	1	1
284	42	1	1	3	6	6	1	2	2	2	3	2	1	1	2	1	1	1	2	2	1	1	1	1	2	2	2	1	2	2	2	1	1	1	1	1	1	1	2	2	2	2	3	1	2	1	1	1	1
285	40	2	1	4	3	2	7	2	2	2	3	2	2	1	2	2	1	1	2	1	1	2	1	2	1	2	2	2	2	2	2	2	1	1	1	1	1	1	2	2	2	1	3	3	2	1	1	1	1
286	60	2	1	3	3	6	1	1	2	1	2	1	1	1	1	1	1	1	1	1	1	2	1	2	1	2	2	1	1	2	1	2	1	1	1	1	1	1	1	1	1	1	3	3	1	1	1	1	1
287	45	2	1	3	4	7	1	2	2	2	2	1	1	1	1	1	1	1	1	1	1	2	1	2	1	2	2	1	1	2	1	2	1	#NULL!	1	1	1	1	1	1	1	1	3	3	2	1	1	1	1
288	72	2	1	3	2	0.5	2.3	2	2	2	2	2	1	1	2	1	1	1	2	2	1	2	2	1	1	2	2	2	2	2	2	1	1	1	1	1	1	1	1	1	2	1	1	1	2	1	1	1	1
289	30	2	2	5	1	3	1	2	2	2	2	2	1	1	1	2	2	2	2	2	1	2	1	1	1	2	2	2	2	2	2	2	2	1	1	1	1	1	2	2	1	1	1	1	2	1	1	2	1
290	70	2	1	3	2	15	7	2	2	2	2	2	1	1	1	1	1	1	2	1	1	1	1	2	2	2	2	1	2	2	2	2	1	1	1	1	1	1	2	1	2	1	1	1	2	1	1	1	1
291	24	2	1	3	4	6	#NULL!	2	2	2	2	2	1	1	1	1	1	1	2	1	1	2	1	2	2	2	2	2	2	2	2	2	1	1	1	1	1	1	2	2	2	1	3	1	2	1	1	1	1
292	64	2	1	4	2	19	7	2	2	2	2	2	1	1	2	1	1	2	2	2	1	2	1	2	2	2	2	2	2	2	2	2	1	1	1	1	1	1	1	2	2	1	3	3	2	1	1	1	1
293	71	2	1	#NULL!	3	3	1	2	2	2	2	2	1	1	1	1	1	1	2	1	1	2	2	1	1	2	2	2	2	2	2	2	1	1	1	1	2	1	2	2	2	1	1	1	2	1	1	1	1
294	39	1	1	6	2	8	1	2	2	2	3	2	2	1	1	1	2	2	2	2	1	1	1	2	2	2	2	2	2	2	2	2	1	1	1	1	2	1	2	2	2	2	3	3	2	1	1	2	1
295	38	2	1	5	3	15	1	2	2	2	1	2	1	1	1	1	1	1	2	1	1	2	1	2	2	1	2	1	2	2	2	2	1	1	1	1	1	1	2	2	1	1	3	1	2	1	1	2	1
296	45	1	1	4	4	#NULL!	1	2	2	2	2	2	1	1	1	1	1	1	1	1	1	2	1	2	1	2	2	1	2	2	2	2	1	1	1	1	1	1	2	2	2	1	1	1	2	1	1	1	1
297	40	2	1	3	6	7	#NULL!	2	2	2	2	2	2	2	2	1	1	1	1	2	1	2	1	2	2	2	2	2	2	2	2	2	1	1	1	1	1	2	2	2	2	2	1	1	2	1	1	1	1
298	37	2	1	5	6	14	1	2	2	2	2	2	1	1	1	2	1	2	2	2	1	2	1	2	2	2	2	2	2	2	2	2	1	1	1	1	2	2	2	1	2	1	3	3	2	1	1	2	1
299	55	1	1	3	1	#NULL!	1	2	2	2	2	2	2	1	2	1	1	1	2	1	1	2	1	2	2	2	2	2	2	2	2	2	2	1	1	1	1	1	2	1	2	1	1	1	2	1	1	1	1
300	47	1	1	4	2	5	1	1	2	2	1	2	1	1	1	1	1	1	2	2	1	2	1	2	1	2	2	2	2	2	2	2	1	#NULL!	1	1	1	1	2	1	2	1	3	1	2	1	1	1	1
301	34	1	2	4	1	4	1	2	2	2	2	2	1	1	1	1	2	2	2	2	1	2	1	2	2	2	2	2	2	2	2	2	1	1	1	1	1	1	1	1	1	1	3	1	2	1	1	2	1
302	38	2	1	3	2	7	1	2	2	2	2	2	1	2	1	1	1	1	2	2	1	2	1	2	2	2	2	2	2	2	2	2	1	1	1	1	1	1	2	1	2	2	2	1	2	1	1	1	1
303	39	2	1	4	3	#NULL!	1	2	2	2	3	2	1	1	2	1	1	1	2	2	1	1	1	1	1	2	2	2	2	2	1	2	3	1	1	1	1	1	2	2	2	2	3	3	2	1	1	1	1
304	20	1	1	4	4	1	1	2	2	2	2	2	2	1	2	2	2	2	2	2	1	2	1	2	1	2	2	2	2	2	2	2	3	2	1	1	2	1	2	2	2	2	2	1	2	2	1	1	1
305	60	2	1	3	2	30	1	2	2	2	2	2	1	1	1	1	1	1	1	1	1	2	1	2	1	2	2	1	1	2	2	2	1	1	1	1	1	2	2	1	1	1	3	1	2	1	1	1	1
306	39	2	1	3	4	7	7	2	2	2	2	2	1	1	1	1	1	1	1	1	1	2	1	1	1	2	2	2	2	2	2	1	3	1	1	1	1	1	1	1	2	1	3	1	2	1	1	1	1
307	45	1	1	5	1	#NULL!	1	2	2	2	2	2	1	1	2	1	1	1	1	1	1	2	1	2	2	2	2	2	1	2	2	2	2	1	1	1	1	1	2	2	2	1	1	1	2	1	1	1	1
308	38	2	1	4	3	18	1	2	2	2	3	2	2	1	2	2	1	2	2	2	1	2	1	2	2	2	2	2	2	2	2	2	3	1	1	1	1	1	1	2	2	1	3	3	2	1	1	1	1
309	28	2	1	3	4	10	1	2	2	2	2	2	1	1	2	1	1	1	1	1	1	2	1	1	2	2	2	2	1	2	2	2	1	1	1	1	1	1	2	1	1	1	3	1	2	1	1	1	1
310	46	1	1	4	5	#NULL!	1	2	2	2	2	2	1	1	1	1	1	1	2	1	1	2	1	2	2	1	2	2	2	2	2	2	1	1	1	1	1	2	2	2	2	2	3	1	2	1	1	1	1
311	59	1	1	5	2	18	1	2	2	2	3	2	2	1	1	1	1	1	2	2	1	2	2	2	1	2	2	1	2	2	2	2	1	1	1	1	1	1	2	2	2	1	3	3	2	1	1	1	1
312	55	2	1	3	2	5	7	2	2	2	2	2	2	2	2	1	1	1	2	2	1	2	1	2	2	2	2	1	2	2	2	2	3	1	1	1	2	1	2	2	2	1	1	1	2	1	1	1	1
313	44	1	1	4	3	24	1	2	2	2	2	2	1	1	1	1	1	1	2	1	1	2	1	2	2	2	2	2	2	2	2	2	3	1	1	1	2	1	2	1	2	2	3	3	2	1	1	1	1
314	38	2	1	4	5	10	1	2	2	2	2	2	2	1	2	1	2	2	2	2	1	2	2	2	2	2	2	2	2	2	2	2	3	1	1	1	1	1	1	1	2	1	3	3	2	1	1	1	1
315	47	2	1	3	3	1	1	2	2	2	2	2	1	1	2	2	1	1	2	2	1	2	2	2	2	2	2	2	2	2	2	2	3	1	1	1	1	1	2	2	2	2	1	1	2	1	2	1	1
316	28	1	2	5	4	#NULL!	#NULL!	2	2	2	1	2	1	1	2	1	2	2	2	2	2	2	1	2	2	2	2	2	2	2	2	2	3	1	1	1	1	1	2	2	2	2	3	3	2	1	1	1	1
317	51	2	1	4	1	6	1	2	2	2	3	2	2	1	2	1	1	1	1	1	1	2	1	2	2	2	2	2	2	2	2	2	3	1	1	1	1	1	2	2	1	1	3	3	2	1	1	1	1
318	52	1	1	3	5	20	1	2	2	2	2	2	1	1	2	2	1	2	2	2	1	2	2	2	2	2	2	2	2	2	2	2	3	1	1	1	1	1	2	2	2	2	3	1	2	1	1	1	1
319	37	2	1	3	2	10	1	2	2	2	2	2	1	1	1	1	1	1	1	1	1	2	1	1	2	2	2	2	2	2	2	2	1	1	1	1	2	2	2	2	2	2	1	1	2	1	1	2	2
320	37	1	1	5	4	11	1	2	2	2	3	2	1	2	2	2	1	1	2	2	1	2	1	2	1	2	2	1	2	2	2	2	1	1	1	1	1	1	1	1	1	1	3	3	2	1	1	1	1
321	55	1	1	5	3	33	4	2	2	2	2	2	2	2	2	1	1	2	2	2	1	2	1	2	2	2	2	2	2	2	2	2	1	1	1	1	1	1	2	2	2	2	1	1	1	1	1	1	1
322	31	2	1	3	5	13	1	2	2	2	2	2	1	1	1	1	1	1	2	2	1	1	1	1	1	2	2	2	2	2	2	2	1	1	1	1	1	1	1	1	1	1	1	3	1	1	1	1	1
323	48	2	1	3	5	17	1	2	2	2	2	2	2	2	2	2	2	2	2	2	1	2	1	2	2	2	2	2	2	2	2	2	3	1	1	1	1	1	1	1	2	1	3	3	2	1	1	1	1
324	59	1	1	5	2	2	2.9	2	2	2	2	2	1	1	2	1	1	2	2	2	1	2	2	2	2	2	2	2	2	2	2	1	2	1	1	1	1	1	2	2	2	1	1	1	2	1	1	1	1
325	53	1	1	3	3	#NULL!	#NULL!	#NULL!	#NULL!	3	3	1	2	2	2	2	2	2	2	2	1	2	2	2	2	2	2	2	2	2	2	2	1	2	1	2	2	2	2	2	2	2	3	3	2	2	1	1	2
326	34	1	1	5	4	11	1	2	2	2	2	2	2	1	1	2	2	2	2	2	1	2	2	2	2	2	2	2	2	2	2	2	3	1	1	1	2	1	2	2	2	2	3	1	2	1	1	1	1
327	47	2	1	4	3	17	1	2	2	2	2	2	2	2	2	2	2	2	2	2	1	2	1	2	2	2	2	2	2	2	2	2	1	1	1	1	1	1	1	1	2	1	1	1	2	1	1	1	1
328	48	1	1	4	5	8	1	2	2	2	2	2	1	1	2	1	1	1	2	1	1	2	1	2	2	2	2	1	2	2	2	1	1	1	1	1	1	1	2	2	2	1	1	1	2	1	1	2	1
329	55	1	1	5	2	33	1	2	2	2	3	2	1	1	1	1	1	1	2	1	1	1	1	2	1	2	2	2	2	2	2	2	1	1	1	1	1	1	1	1	1	1	1	1	2	1	1	1	1
330	49	1	1	5	4	24	1	2	2	2	1	2	2	2	2	1	2	1	2	1	1	1	1	2	1	2	2	1	2	1	2	2	1	1	1	1	1	1	2	2	2	1	3	3	2	1	1	1	1
331	73	2	1	2	1	4	1	2	2	2	2	2	1	1	1	1	1	2	2	2	1	2	2	2	1	2	2	2	2	2	2	2	1	1	1	1	1	2	2	2	1	2	1	1	2	1	1	1	1
332	72	1	1	3	6	3	1	2	2	2	2	2	2	2	2	1	2	2	2	2	1	2	2	1	2	2	2	2	2	2	2	2	2	1	1	1	1	1	2	2	2	1	1	1	2	2	1	1	1
333	34	2	1	5	3	12	1	2	2	2	2	2	1	1	1	1	1	2	2	2	1	2	1	2	2	2	2	1	2	2	2	2	1	1	1	1	1	1	2	2	2	2	3	3	2	1	1	1	1
334	79	1	1	2	5	#NULL!	3	2	2	2	2	2	1	1	1	1	1	2	2	2	1	2	2	2	1	2	2	2	2	2	2	2	2	1	1	1	1	1	1	2	2	2	1	1	2	1	1	1	1
335	51	2	1	3	3	1.5	1	2	2	2	2	2	1	1	2	1	2	2	2	2	1	2	2	2	2	2	2	2	2	2	2	2	3	#NULL!	2	2	2	2	2	2	2	2	3	1	2	1	2	2	1
336	50	1	1	5	5	1	1	2	2	2	3	2	1	2	2	1	1	1	1	1	1	2	1	2	1	2	2	2	2	2	2	2	1	1	1	1	1	1	1	1	2	1	1	1	2	1	1	1	1
337	69	2	1	3	1	#NULL!	1	2	2	2	2	2	1	1	2	1	1	1	2	2	1	2	2	2	1	2	2	2	2	2	2	2	3	1	1	1	1	1	1	1	1	1	3	1	2	1	1	2	1
338	67	2	#NULL!	3	1	17	1	2	2	2	2	2	2	1	2	1	1	1	1	1	1	2	1	2	2	2	2	1	2	2	2	2	3	1	1	1	1	1	1	1	1	1	1	1	2	1	1	1	1
339	51	2	1	3	5	0	1	2	2	2	2	2	1	2	2	2	1	1	2	2	1	2	1	2	2	2	2	2	2	2	2	2	3	2	1	1	1	1	1	1	2	1	1	1	2	1	1	1	1
340	56	2	1	5	4	#NULL!	7	2	2	2	2	2	1	1	1	1	1	1	1	1	1	2	1	2	2	2	2	1	2	2	2	2	2	1	1	1	1	1	2	1	2	1	1	1	2	1	1	1	1
341	74	2	1	3	1	12	1	2	2	2	2	2	1	1	1	1	1	1	1	1	1	2	2	2	1	2	2	1	1	2	2	1	1	#NULL!	1	1	1	1	1	2	2	1	1	1	2	1	1	1	1
342	71	1	1	4	3	17	3	2	2	2	2	2	2	1	2	2	2	1	2	2	1	1	2	2	2	2	2	2	2	2	2	2	3	1	1	1	1	1	2	2	2	1	3	3	2	1	1	1	1
343	60	2	1	4	6	5	1	2	2	2	3	1	2	2	2	2	2	2	2	2	2	2	2	1	2	2	2	2	2	2	2	2	3	1	2	1	2	1	2	1	2	2	3	3	2	2	1	1	1
344	72	2	1	2	1	#NULL!	1	2	2	2	2	1	2	2	2	2	2	2	2	2	1	1	2	2	2	2	2	2	2	2	2	2	3	2	1	1	1	1	1	1	2	1	3	3	1	1	1	1	1
345	65	1	1	5	1	14	3	2	2	2	2	2	1	2	2	2	1	2	2	1	1	2	1	2	2	2	2	2	2	2	2	2	2	1	1	1	1	1	2	1	2	1	1	1	2	1	1	1	1
346	46	2	1	4	3	10	1	2	2	2	2	2	1	1	1	1	1	1	2	1	1	2	1	2	1	2	2	2	1	2	2	2	1	1	1	1	1	1	2	2	1	1	2	1	2	1	1	1	1
347	69	2	1	2	3	5	#NULL!	2	2	2	2	2	2	1	2	1	2	2	2	2	1	2	2	2	2	2	2	2	2	2	2	2	3	1	1	1	2	1	2	1	2	1	3	1	2	1	1	1	1
348	43	2	1	3	5	8	1	2	2	2	3	2	1	1	2	1	1	2	2	2	1	2	1	2	2	2	2	2	2	2	2	2	1	1	1	1	2	1	2	2	2	1	3	1	2	1	1	1	1
349	39	2	1	3	3	8	1	2	2	2	2	1	2	2	2	2	2	2	2	2	1	2	2	2	2	2	2	2	2	2	2	2	1	1	1	1	1	2	2	2	2	2	3	1	2	1	1	1	1
350	49	2	1	3	4	1	1	2	2	2	2	2	1	1	1	1	1	1	1	1	1	2	1	2	2	2	2	2	2	2	2	2	3	1	1	1	1	1	2	2	2	1	1	1	2	1	1	1	1
351	47	2	1	3	6	10	1	2	2	2	2	2	1	1	1	1	1	1	2	1	1	2	1	2	1	2	2	2	2	2	2	2	1	1	1	1	1	1	2	1	1	1	1	1	2	1	1	1	1
352	54	2	1	3	#NULL!	4	7	2	2	2	2	2	1	1	2	2	1	1	2	1	1	2	1	1	1	2	2	2	2	2	2	2	3	1	1	1	1	1	1	2	2	1	3	3	2	1	1	2	1
353	33	2	1	5	5	0	1	1	2	2	2	2	1	1	1	1	1	1	2	1	1	2	1	2	2	2	2	2	2	2	2	2	1	1	1	1	1	1	1	1	2	1	1	1	1	1	1	1	1
354	48	2	1	3	1	0	7	2	2	2	2	2	2	2	2	2	1	2	2	2	1	2	2	2	2	2	2	2	2	2	2	2	1	1	1	1	1	1	2	2	2	2	3	3	2	1	1	2	1
355	40	2	1	3	4	20	1	2	2	2	2	2	1	1	1	1	1	1	2	1	1	2	1	1	2	2	2	2	2	2	2	2	1	1	1	1	1	1	2	2	2	1	3	1	2	1	1	1	1
356	42	2	2	3	3	6	3	#NULL!	2	2	3	2	2	1	1	2	2	2	2	2	1	2	1	2	2	2	2	2	2	2	2	2	1	#NULL!	1	1	1	1	2	1	2	2	1	1	2	1	1	2	1
357	35	1	1	5	1	4	1	1	2	2	2	2	1	1	1	1	1	1	2	1	1	1	1	2	1	1	2	2	2	2	2	2	1	1	1	1	1	1	2	1	1	2	1	1	2	1	1	1	1
358	52	2	1	3	2	20	1	2	2	2	2	2	1	1	2	2	1	1	2	2	1	2	2	2	1	2	2	2	2	2	2	2	1	1	1	1	1	1	2	2	2	1	1	1	2	1	1	2	1
359	53	2	1	3	2	4	1	2	2	2	3	2	1	2	2	1	1	1	2	2	1	1	2	2	1	2	2	2	2	2	2	2	1	1	1	1	1	1	1	2	2	1	2	1	2	1	1	1	1
360	52	2	1	3	2	9	1	1	2	2	2	2	1	1	2	1	1	1	2	1	1	2	1	2	2	1	2	2	2	2	2	2	1	1	1	1	1	1	1	1	1	1	2	1	2	1	1	1	1
361	35	1	1	4	5	15	1	2	2	2	2	2	1	1	2	2	1	1	2	1	1	2	2	1	1	2	2	2	2	2	2	2	1	1	1	1	1	1	2	2	2	2	1	1	2	1	1	1	1
362	52	2	1	3	4	5	1	2	2	2	2	2	1	1	2	2	1	1	2	2	1	2	1	1	2	2	2	2	2	2	2	2	1	1	1	1	1	1	2	2	2	1	3	3	2	1	1	1	1
363	31	2	1	4	4	4	1	2	2	2	3	2	1	1	2	1	1	1	2	2	1	2	1	2	1	2	2	1	2	2	2	2	1	1	1	1	1	1	2	2	2	1	3	3	2	1	1	1	1
364	42	2	1	3	4	#NULL!	1	2	2	2	3	1	2	2	2	2	2	2	2	2	1	2	2	2	2	2	2	2	2	2	2	2	3	2	1	1	1	1	2	2	2	1	3	3	2	1	1	1	1
365	53	1	2	3	2	17	1	1	2	2	2	2	1	1	1	1	2	2	2	1	1	2	2	1	1	2	2	2	2	2	2	2	1	1	1	1	1	1	2	2	1	1	1	1	2	1	1	1	1
366	28	2	1	3	5	3	1	2	2	2	2	2	2	1	1	1	1	1	1	2	1	2	1	2	2	2	2	2	2	2	2	2	1	1	1	1	1	1	2	1	2	1	3	3	2	1	1	1	1
367	25	2	2	6	2	2	1	1	2	2	2	2	1	2	2	2	2	2	2	2	2	2	1	2	2	2	2	2	2	2	2	2	1	1	2	2	2	1	2	2	2	2	3	3	2	2	1	2	2
368	28	2	1	3	5	9	1	2	2	2	3	2	2	1	1	1	2	2	2	2	1	2	1	1	1	2	2	2	2	2	2	2	1	1	1	1	1	1	2	1	2	1	3	3	2	1	1	1	1
369	54	2	1	3	2	8	1	2	2	2	2	2	2	1	2	1	1	2	2	2	1	2	1	2	2	2	2	2	2	2	2	2	1	1	1	1	1	1	2	2	2	1	3	3	2	1	1	1	1
370	54	2	1	3	1	6	5	2	2	2	2	2	1	2	2	1	1	1	2	1	1	2	1	2	2	2	2	2	2	2	2	2	1	1	1	1	1	1	1	1	2	1	3	1	2	1	1	1	1
371	39	2	1	3	5	4	1	2	2	2	2	2	2	1	2	1	1	1	2	2	1	2	2	2	1	2	2	2	2	2	2	2	1	1	1	1	1	1	2	2	2	1	2	1	2	1	1	1	1
372	26	2	1	3	4	8	1	2	2	2	2	2	1	1	1	1	1	1	1	1	1	2	1	1	1	2	2	2	2	2	2	2	1	1	1	1	1	1	2	2	1	1	1	1	2	1	1	1	1
373	40	2	1	3	6	0.4	1	2	2	2	3	2	1	1	2	2	2	2	2	2	1	2	1	2	2	2	2	2	2	2	2	2	3	1	1	1	1	1	2	2	2	2	3	3	2	1	1	1	1
374	25	2	1	3	4	7	1	2	2	2	3	1	2	2	2	2	2	2	2	2	1	2	1	2	2	2	2	2	2	2	2	2	1	1	1	1	1	1	2	1	2	2	3	3	2	1	2	2	1
375	35	2	1	3	4	11	1	2	2	2	2	2	1	1	1	2	2	2	2	2	1	2	2	2	2	2	2	2	2	2	2	2	1	2	1	1	1	1	2	2	2	1	1	1	2	1	1	1	1
376	31	1	2	4	1	#NULL!	#NULL!	1	2	2	2	2	1	1	1	1	1	1	1	1	1	2	1	1	2	2	2	1	1	2	2	2	1	1	1	1	1	1	1	1	2	1	2	1	2	1	1	1	1
377	39	2	1	3	6	7	1	2	2	2	2	2	2	1	2	2	2	2	2	2	1	2	1	2	1	2	2	2	2	2	2	2	1	1	1	1	1	1	2	1	2	1	3	3	2	1	1	1	1
378	60	2	1	3	2	#NULL!	#NULL!	1	2	2	3	2	1	1	1	1	1	1	2	2	1	1	2	2	2	1	2	2	2	2	2	2	1	1	1	1	1	1	2	1	2	1	3	3	2	1	1	1	1
379	35	2	2	5	4	0.2	1	2	2	2	2	2	1	2	2	2	2	1	2	1	1	2	1	2	2	2	2	2	2	2	2	2	3	2	1	1	1	1	1	1	1	1	3	3	1	1	1	1	1
380	27	2	1	3	6	3	1	2	2	2	3	2	2	2	2	1	1	2	2	2	1	2	1	2	1	2	2	2	2	2	2	2	3	1	1	1	1	1	2	2	2	2	1	1	2	1	1	1	1
381	40	2	1	3	2	#NULL!	1	2	2	2	2	2	1	1	2	1	1	1	2	1	1	1	1	1	1	2	2	2	2	2	2	2	1	1	1	1	1	1	1	1	2	1	3	3	2	1	1	1	1
382	48	2	1	3	2	5	1	1	2	2	3	2	2	1	1	1	1	1	2	1	1	2	1	2	1	2	2	2	2	2	2	2	1	1	1	1	1	1	2	1	1	1	1	3	2	1	1	1	1
383	46	2	1	3	1	22	1	2	2	2	2	2	1	1	2	2	2	1	2	1	1	2	1	2	1	2	2	2	2	2	2	2	3	1	1	1	1	1	2	2	2	1	3	1	2	1	1	1	1
384	61	2	1	3	3	#NULL!	1	2	2	2	2	2	1	1	2	2	1	2	2	2	1	2	1	2	2	2	2	1	2	2	2	2	1	1	1	1	1	1	1	1	2	1	3	3	2	1	1	1	1
385	37	2	1	3	4	0	1	2	2	2	3	2	2	1	2	1	1	2	2	2	1	2	1	2	2	2	2	2	2	2	2	2	3	1	1	1	1	1	2	1	1	1	3	3	2	2	1	1	1
386	54	2	2	4	2	0.5	1	1	2	2	2	2	1	1	1	1	2	2	2	1	1	1	1	1	1	1	1	1	1	1	1	2	1	1	1	1	1	1	2	2	2	2	3	1	2	1	1	1	1
387	40	2	1	4	5	20	1	1	2	2	2	2	1	1	1	1	1	1	2	1	1	2	1	2	1	1	2	2	2	2	2	2	1	1	1	1	1	1	1	1	1	1	1	1	2	1	1	1	1
388	42	2	2	#NULL!	#NULL!	#NULL!	1	2	2	2	1	2	1	2	2	2	2	1	2	1	1	1	1	1	1	2	2	1	2	2	2	2	1	2	1	1	2	1	1	1	1	1	3	1	2	2	1	1	1
389	44	2	1	3	6	0.5	1	2	2	2	2	2	2	2	2	2	1	2	2	2	1	2	2	2	2	2	2	2	2	2	2	2	2	#NULL!	1	2	1	1	2	2	2	2	1	1	2	2	1	2	1
390	39	2	1	3	4	1	1	2	2	2	3	2	1	1	2	1	1	1	2	2	1	2	1	2	1	2	2	2	2	2	2	2	1	1	1	1	1	1	2	1	2	1	3	3	2	1	1	1	1
391	44	2	1	3	4	12	1	2	2	2	3	2	1	2	2	1	1	2	2	2	1	2	1	1	1	2	2	2	2	2	2	2	1	1	1	1	1	1	2	2	2	1	1	1	2	1	1	1	1
392	50	2	1	3	5	18	1	2	2	2	2	2	2	1	2	1	1	1	2	2	1	2	1	2	2	2	2	2	2	2	2	2	2	2	1	1	1	1	2	2	2	1	3	1	2	1	1	1	1
393	34	2	1	4	5	#NULL!	1	2	2	2	2	2	1	1	1	1	1	1	1	1	1	2	1	2	2	2	2	2	2	2	2	2	1	1	1	1	1	1	1	2	2	2	3	3	2	1	1	1	2
394	53	2	1	3	1	5.5	1	2	2	2	2	2	1	1	2	1	1	2	2	2	1	1	1	2	1	2	2	2	2	2	2	2	1	1	1	1	1	1	2	2	1	1	1	1	2	1	1	1	1
395	41	1	1	5	4	13	3	2	2	2	2	2	1	1	1	1	1	1	2	2	1	2	1	1	1	2	2	2	2	2	2	2	3	1	1	1	1	1	2	2	2	1	1	1	2	1	1	1	1
396	42	1	1	5	3	9	1	2	2	2	2	2	1	1	2	2	1	2	2	2	1	1	1	1	2	2	2	2	2	2	2	2	1	1	1	1	1	1	2	2	2	1	3	3	2	1	1	1	1
397	48	1	1	4	2	13	1	2	2	2	1	2	1	1	2	1	1	2	2	2	1	2	1	2	2	2	2	2	2	2	2	2	3	1	1	1	1	1	2	2	2	2	3	3	2	1	1	1	1
398	38	1	#NULL!	3	3	#NULL!	#NULL!	#NULL!	#NULL!	3	3	2	2	1	2	2	2	2	2	2	1	2	2	2	2	2	2	2	2	2	2	2	3	#NULL!	2	2	2	2	2	2	2	2	3	3	2	2	2	2	2
399	47	1	1	4	5	9	1	2	2	2	2	2	2	1	2	2	1	1	2	1	1	2	1	2	2	2	2	2	2	2	2	2	1	1	1	1	1	1	1	1	1	1	1	1	2	1	1	1	1
400	43	2	1	3	4	3	1	2	2	2	2	2	1	1	1	1	2	1	2	1	1	2	1	1	1	2	2	2	2	2	2	2	1	1	1	1	1	1	1	1	1	1	1	1	2	1	1	1	1
401	44	2	1	4	2	7	1	2	2	2	2	2	2	1	2	2	1	2	2	2	1	2	1	2	2	2	2	2	2	2	2	2	1	1	2	1	1	1	2	2	2	1	3	3	2	1	2	2	1
402	43	2	1	#NULL!	4	3	1	2	2	2	2	2	1	2	2	1	2	2	2	2	1	2	2	2	2	2	2	2	2	2	2	2	3	2	1	1	1	1	2	2	2	2	1	1	2	1	1	1	1
403	58	1	1	2	4	5	5	2	2	2	2	1	2	2	2	2	2	2	2	2	1	1	1	2	2	2	2	2	2	2	2	2	2	1	1	1	1	1	2	2	2	1	3	3	2	1	1	1	1
404	55	2	1	4	1	7	7	2	2	2	3	2	2	1	2	2	1	1	2	1	1	2	1	2	1	2	2	2	2	2	2	2	3	1	1	1	1	1	2	2	2	1	3	1	2	1	1	2	1
405	24	1	1	3	2	0.5	1	2	2	2	1	2	1	1	1	1	1	1	2	1	1	2	1	2	2	2	2	2	2	2	2	2	1	1	1	1	2	1	2	2	2	2	1	1	2	2	1	1	1
406	64	2	1	3	1	10	1	2	2	2	2	2	2	1	1	2	2	2	2	2	1	2	2	2	2	2	2	2	2	2	2	2	1	1	1	1	1	1	1	1	1	1	1	2	2	1	1	1	1
407	29	1	1	5	1	3	1	2	2	2	2	2	1	1	2	1	1	2	2	1	2	2	1	2	2	2	2	2	2	2	2	2	1	1	1	1	2	1	2	2	2	1	1	1	2	1	1	1	1
408	64	2	1	4	1	14	1	2	2	2	1	2	1	1	1	1	1	1	1	1	1	2	1	2	1	2	2	2	2	2	2	1	1	1	1	1	1	1	2	2	2	2	1	1	2	1	1	1	1
409	64	2	1	3	3	4	3	2	2	2	2	2	1	1	1	1	1	1	2	2	1	1	1	1	1	2	2	2	2	2	2	2	1	#NULL!	1	1	1	1	2	1	2	1	1	1	2	1	1	2	1
410	44	2	1	4	5	8	1	2	2	2	2	2	2	2	2	2	1	1	2	2	1	1	2	2	2	2	2	2	2	2	2	2	1	1	1	1	1	1	2	2	2	1	3	3	2	1	1	1	1
411	62	2	1	3	3	1	1	2	2	2	2	2	1	1	2	1	1	2	2	2	1	2	2	2	1	2	2	2	2	2	2	2	1	2	1	1	1	2	2	2	2	1	1	1	2	1	1	1	1
412	35	1	1	4	6	15	1	2	2	2	2	2	1	1	1	1	1	1	2	1	1	2	1	2	2	2	2	2	2	2	2	2	1	1	1	1	2	1	2	2	2	1	3	3	2	1	1	1	1
413	45	2	1	3	4	#NULL!	1	2	2	2	2	2	1	1	2	1	2	1	2	1	1	2	2	2	1	2	2	1	2	2	2	2	2	1	1	1	1	1	2	2	2	1	3	1	2	1	1	1	2
414	45	2	1	2	5	4	1	2	2	2	3	1	2	2	2	2	2	2	2	2	1	2	1	2	2	2	2	2	2	2	2	2	3	2	1	1	2	1	2	2	2	2	3	3	2	2	1	1	1
415	45	2	2	4	1	#NULL!	1	2	2	2	1	2	2	2	2	2	2	2	2	1	2	2	1	2	2	2	2	2	1	2	2	2	1	2	1	1	2	1	2	2	2	2	3	3	2	1	1	1	2
416	45	2	2	5	1	#NULL!	1	2	2	2	2	2	2	2	1	2	2	2	2	2	1	2	1	2	2	2	2	2	2	2	2	2	2	1	1	1	1	1	2	2	2	2	3	3	2	1	1	1	1
417	45	2	2	5	1	#NULL!	1	2	2	2	2	2	2	2	1	2	2	2	2	2	1	2	1	2	2	2	2	2	2	2	2	2	2	1	1	1	1	1	2	2	2	2	3	3	2	1	1	1	1
418	45	2	1	3	3	28	1	2	2	2	2	2	2	1	2	2	1	1	2	2	1	2	2	2	1	2	2	2	2	2	2	2	1	1	1	1	2	1	2	2	2	2	1	1	2	1	1	1	1
419	45	1	1	4	6	3	1	2	2	2	2	2	1	2	2	1	1	2	2	2	1	2	2	2	2	2	2	2	2	2	2	2	3	1	1	1	1	1	2	2	2	2	3	1	2	2	2	2	1
420	45	2	1	4	4	10	1	2	2	2	2	2	1	1	2	1	1	2	2	2	1	2	2	2	1	2	2	2	2	2	2	2	1	1	1	1	1	1	2	2	2	1	3	3	2	1	1	1	1
421	45	2	1	3	2	15	1	2	2	2	2	2	1	1	1	1	1	1	1	1	1	2	2	1	1	2	2	2	2	2	2	2	1	1	1	1	2	2	2	2	2	1	1	1	2	1	1	1	1
422	45	2	1	3	1	15	1	2	2	2	3	2	2	1	2	1	1	1	2	2	1	2	2	2	2	2	2	2	2	2	2	2	3	1	1	1	1	1	1	1	2	1	3	1	2	1	1	1	1
423	45	1	1	3	4	2	1	2	2	2	3	2	1	2	2	2	2	2	2	2	1	2	2	2	2	2	2	2	2	2	2	2	3	1	1	1	2	2	2	2	2	1	2	1	1	2	2	2	2
424	45	1	1	3	5	0	1	2	2	2	2	2	2	2	1	2	2	2	1	1	1	2	1	2	1	2	1	2	2	2	2	2	1	1	1	1	1	1	2	2	2	1	1	1	2	1	1	1	1
425	45	1	1	3	4	0.25	1	2	2	2	2	2	1	1	1	1	1	1	2	1	1	2	1	1	1	2	2	2	2	2	2	2	1	1	1	1	1	1	1	1	1	1	2	2	2	1	1	1	1
426	45	2	1	4	2	#NULL!	1	2	2	2	2	2	1	2	2	1	1	1	2	2	1	2	2	2	2	2	2	2	2	2	2	2	1	2	1	1	1	2	1	1	2	2	3	3	2	1	1	1	1
427	45	2	1	5	3	4	1	2	2	2	2	2	1	1	2	1	1	1	1	1	1	2	1	1	1	2	2	2	2	2	2	2	1	1	1	1	1	1	2	2	2	1	1	1	2	1	1	1	1
428	45	1	1	5	6	1	3	2	2	2	1	2	2	2	1	1	2	1	2	2	1	2	1	2	2	2	2	2	2	2	2	2	1	1	1	1	2	1	2	2	2	1	1	2	2	1	1	1	1
429	45	1	1	4	4	28	1	2	2	2	2	2	1	1	2	2	2	2	2	2	1	1	2	2	2	2	2	2	2	2	2	2	1	1	1	1	1	1	1	2	2	1	1	1	2	1	1	1	1
430	45	2	1	3	5	4	7	2	2	2	2	2	2	1	2	1	1	1	2	1	1	1	1	1	1	2	2	1	2	2	2	2	1	1	1	1	1	1	1	1	1	1	1	1	2	1	1	1	1
431	45	2	2	3	2	1	1	2	2	2	1	2	1	1	1	1	1	1	1	1	1	2	1	1	1	2	2	2	1	2	1	2	2	2	1	2	2	1	1	1	2	1	1	1	2	1	1	1	1
432	45	1	1	5	5	2	1	2	2	2	2	2	2	1	2	2	1	2	2	2	1	2	2	2	2	2	2	2	2	2	2	2	3	1	1	1	2	1	2	2	2	2	1	1	2	1	2	2	1
433	45	2	1	4	4	6	7	2	2	2	2	2	1	1	2	2	2	1	2	2	1	2	1	2	2	2	2	2	2	2	2	2	1	1	1	1	1	1	2	2	2	1	3	1	2	1	1	1	1
434	45	1	1	5	3	6	1	2	2	2	2	1	2	2	2	2	2	2	2	2	1	2	2	2	1	2	2	2	2	2	2	2	2	1	1	1	1	1	1	1	2	1	3	1	2	1	1	1	1
435	45	1	1	3	4	13	1	2	2	2	2	2	2	1	1	1	1	2	2	2	1	1	1	2	1	2	2	2	2	2	2	2	1	1	1	1	2	1	2	1	2	1	1	1	2	1	1	1	1
436	45	2	1	3	3	5	1	2	2	2	3	2	2	2	2	1	1	2	2	2	1	2	1	1	2	2	2	2	2	2	2	2	3	1	1	1	2	1	2	1	2	1	3	1	2	1	1	1	1
437	45	1	1	4	4	1	1	2	2	2	2	2	2	1	1	1	1	1	2	1	1	2	1	1	1	2	2	2	2	2	2	2	1	1	1	1	1	1	1	1	1	1	3	1	2	2	1	1	1
438	45	1	2	6	2	1	1	2	2	2	3	2	1	1	1	1	1	1	1	1	1	1	1	1	1	2	2	2	2	2	2	2	1	1	2	1	1	1	1	1	1	2	1	1	2	2	2	1	1
439	45	2	1	3	2	12	5	2	2	2	2	1	2	2	2	2	2	2	2	1	1	2	1	2	2	2	2	2	2	2	2	2	1	1	1	1	1	2	2	2	2	2	1	1	2	1	1	1	1
440	45	2	1	3	1	1	1	2	2	2	2	2	1	1	2	1	1	2	2	2	1	2	1	2	2	2	2	2	2	2	2	2	1	1	1	1	1	1	2	1	2	1	3	3	2	1	1	1	1
441	45	2	1	4	4	9	1	2	2	2	2	2	1	1	1	1	1	1	2	2	1	2	1	2	2	2	2	1	2	2	2	2	3	1	1	1	1	1	2	1	1	1	1	1	2	1	1	1	1
442	45	2	1	3	1	#NULL!	1	2	2	2	2	2	1	1	2	2	2	1	2	1	1	2	1	2	1	2	2	2	2	2	2	2	1	1	1	1	1	1	2	2	2	1	3	2	2	1	1	1	1
443	45	2	1	3	2	12	1	2	2	2	2	2	1	2	2	2	2	2	2	2	1	2	2	2	2	2	2	2	2	2	2	2	3	2	1	1	2	1	2	2	2	1	3	3	2	1	1	1	1
444	45	1	1	5	1	14	1	2	2	2	2	2	2	2	2	2	1	1	2	1	2	2	1	2	2	2	2	2	2	2	2	2	3	1	1	1	1	1	2	2	2	2	3	1	2	1	1	1	1
445	45	2	1	5	3	8	1	2	2	2	2	2	2	2	2	2	1	1	2	2	1	2	1	2	2	2	2	2	2	2	2	2	3	1	1	1	1	1	2	1	1	1	2	1	2	1	1	1	1
446	45	1	1	5	4	20	6	1	2	2	2	2	1	1	2	1	1	2	1	2	1	2	1	2	2	2	2	2	2	2	2	1	1	1	1	1	1	1	1	2	2	1	1	1	2	1	1	1	1
447	45	1	1	5	3	1	3	2	2	2	3	2	2	1	2	1	2	2	2	2	1	2	2	2	2	2	2	2	2	2	2	2	1	1	1	1	1	1	1	1	2	1	1	1	2	1	1	1	1
448	45	1	1	2	#NULL!	18	1	2	2	3	3	1	2	2	2	2	2	2	2	2	1	2	2	2	2	2	2	2	2	2	2	2	3	#NULL!	2	2	2	2	2	2	2	2	3	3	2	2	2	2	2
449	45	1	1	4	1	5	1	2	2	2	2	2	1	1	2	2	2	1	2	1	1	2	1	2	2	2	2	2	2	2	2	2	1	1	1	1	1	1	2	2	2	1	3	1	2	1	1	1	1
450	45	1	1	3	4	9	3	2	2	2	2	2	1	2	1	1	1	1	2	2	1	1	2	2	1	2	2	2	2	2	2	2	1	1	1	1	1	1	1	2	2	1	1	1	2	1	1	1	1
451	45	2	1	3	3	12	1	2	2	2	2	2	1	2	2	1	1	1	2	2	1	2	2	2	2	2	2	2	2	2	2	2	3	1	1	1	2	1	2	2	2	1	1	1	2	1	1	2	2
452	45	1	1	2	4	#NULL!	1	2	2	2	3	2	1	1	1	1	1	1	1	1	1	2	2	2	1	2	2	2	2	2	1	2	1	1	1	1	1	1	1	1	1	1	1	1	2	1	1	1	1
453	45	2	1	4	1	0.25	1	2	2	2	2	2	1	1	2	1	1	1	1	1	1	1	1	2	1	2	2	1	2	2	2	2	1	1	1	1	1	1	1	1	1	1	1	1	2	1	1	2	1
454	45	2	1	4	5	10	1	1	2	2	2	2	1	1	2	2	2	2	2	2	1	2	1	2	2	2	2	2	2	2	2	2	2	1	1	1	1	1	2	1	2	2	3	3	2	1	2	1	1
455	45	1	1	5	2	7	1	2	2	2	3	1	2	2	2	2	2	2	2	2	1	2	2	2	2	2	2	2	2	2	2	2	3	2	1	1	1	1	2	1	2	1	1	1	2	1	1	1	1
456	45	2	1	5	6	8	1	2	2	2	2	2	1	2	1	2	1	1	2	1	1	2	1	1	1	2	2	2	2	2	2	2	1	1	1	1	1	1	1	1	2	1	1	1	2	1	1	1	1
457	45	1	1	5	2	6	1	2	2	2	1	2	1	1	1	1	1	1	1	1	1	2	1	2	2	2	2	2	2	2	2	1	1	1	1	1	1	1	2	1	1	1	1	1	2	1	1	1	1
458	45	1	1	2	1	10	1	1	2	2	2	2	2	1	1	1	1	1	2	1	1	2	1	2	1	2	2	2	2	2	2	2	1	1	1	1	1	1	1	1	1	1	1	1	2	1	1	1	1
459	45	2	1	3	2	11	1	1	2	2	1	2	1	1	1	1	1	1	1	1	1	2	1	2	1	1	2	2	2	2	2	2	1	1	1	1	1	1	1	1	2	1	2	3	2	1	1	1	1
460	45	2	1	4	2	18	1	2	2	2	2	2	1	1	2	2	2	2	2	2	1	2	2	2	2	2	2	2	2	2	2	2	1	1	1	1	1	1	1	2	1	2	2	1	2	1	1	1	1
461	45	1	1	3	1	12	1	2	2	2	2	2	1	2	2	2	1	2	2	2	1	1	2	2	1	2	2	1	2	2	2	2	1	2	1	1	1	1	2	1	1	1	3	3	2	1	1	2	1
462	45	2	2	4	3	5	1	2	2	2	2	2	2	1	1	2	1	1	2	1	1	2	1	2	2	2	2	1	2	2	2	2	1	1	1	1	1	1	2	2	2	2	3	3	2	1	1	1	1
463	45	2	1	3	3	1	1	1	2	2	3	2	1	1	2	2	1	2	2	2	1	2	1	1	1	2	2	2	2	2	2	2	3	2	1	1	2	1	2	2	2	1	3	1	2	1	1	1	1
464	45	2	1	3	3	18	1	1	2	2	3	2	2	1	2	2	1	2	2	2	1	2	2	2	2	2	2	2	2	2	2	2	1	1	1	1	1	1	2	1	2	1	2	1	2	1	1	2	2
465	45	1	1	5	3	19	1	2	2	2	1	2	1	1	2	1	1	1	1	2	1	1	1	2	2	2	2	2	2	2	2	2	3	1	1	1	1	1	2	2	2	1	1	1	2	1	1	1	1
466	45	2	1	4	2	32	3.4	2	2	1	2	2	1	2	2	2	2	2	2	2	1	1	2	2	2	2	2	2	2	2	2	2	2	2	1	1	2	1	2	2	2	1	3	3	2	1	1	1	1
467	45	2	1	5	5	20	1	2	2	2	2	2	1	1	1	1	1	1	2	1	1	2	1	2	2	2	2	2	2	2	2	2	1	1	1	1	1	1	1	1	1	1	3	1	2	1	1	1	1
468	45	2	1	3	4	10	4.6	1	2	2	2	2	1	1	1	1	1	1	1	1	1	1	1	2	1	2	2	2	2	2	2	2	1	1	1	1	1	1	2	1	2	1	1	1	2	1	1	1	1
469	45	1	1	4	5	8	#NULL!	2	2	2	3	2	1	2	1	1	1	1	2	2	1	2	2	1	2	2	2	2	2	2	2	2	3	1	1	1	1	1	2	2	2	2	1	1	2	1	1	1	1
470	45	2	1	4	3	6	1	2	2	2	3	1	2	2	2	2	2	2	2	2	2	2	2	2	1	2	2	2	2	2	2	2	3	1	1	1	1	1	2	2	2	1	3	1	2	1	1	1	1
471	45	1	1	5	2	8	1	2	2	2	2	2	1	1	2	2	1	2	2	2	1	2	2	2	1	2	2	2	2	2	2	2	1	1	1	1	1	1	2	2	2	1	1	1	2	1	1	1	1
472	45	2	1	5	3	13	1	2	2	2	2	2	1	1	2	2	1	1	2	2	1	2	1	2	1	2	2	2	2	2	2	2	1	1	1	1	1	1	2	1	1	1	3	3	2	1	1	1	1
473	45	2	1	5	4	22	2	2	2	2	1	2	1	1	1	1	1	1	2	1	1	2	1	2	2	2	2	1	1	2	2	2	1	1	1	1	1	1	1	1	1	1	1	1	2	1	1	1	1
474	45	1	2	3	3	0.25	1	2	2	2	2	1	2	2	2	2	2	2	2	2	1	2	2	2	2	2	2	2	2	2	2	2	1	2	1	2	1	2	2	1	2	1	3	3	2	1	1	1	2
475	45	2	1	5	5	19	1	1	2	2	3	2	1	2	1	2	2	2	2	2	1	2	1	2	1	2	2	2	2	2	2	2	1	1	1	1	1	1	2	2	2	2	3	2	2	2	1	2	2
476	45	2	1	3	2	8	1	2	2	2	2	2	1	1	2	1	1	1	2	1	1	2	1	2	2	2	2	2	2	2	2	1	1	1	1	1	1	1	2	2	2	1	1	1	2	1	1	1	1
477	45	2	1	3	6	#NULL!	1	1	2	2	2	2	1	1	1	1	1	2	2	2	1	2	2	1	1	1	1	2	2	2	2	2	1	1	1	1	1	1	1	1	1	1	3	3	2	1	1	1	1
478	45	2	1	2	5	#NULL!	3	1	2	2	2	2	1	1	1	1	1	2	2	2	1	2	2	1	1	1	2	2	2	2	2	2	1	1	1	1	1	1	1	1	1	1	3	3	2	1	1	1	1
479	45	2	1	3	4	20	1	1	2	2	2	2	1	1	1	1	1	1	1	1	1	2	1	1	1	1	2	2	2	2	2	2	1	#NULL!	1	1	1	1	2	2	2	2	2	1	1	1	1	1	1
480	45	2	1	3	3	22	1	2	2	2	2	2	1	1	1	1	1	1	1	1	1	2	2	2	2	2	2	2	2	2	2	2	1	1	1	1	1	1	2	1	1	1	1	1	2	1	1	1	1
481	45	2	1	5	3	10	1	2	2	2	1	2	1	1	1	1	1	1	2	2	1	1	1	2	2	2	2	2	2	2	2	2	1	1	1	1	1	1	1	1	2	1	3	3	2	1	1	1	1
[truncated: 60 more columns]

## Sheet: corresponding table
Questionnaire	Answer column
Q1	Inputted values
Q2	Selection Number
Q3	Selection Number
Q4	Selection Number
Q5	Selection Number
Q6	Inputted values
Q7	Selection Number
Q8	Selection Number
Q9	Selection Number
Q10	Selection Number
Q11	Selection Number
Q12_1-Q12_9	1.Yes 2.No
Q13_1-Q13_12	1.Yes 2.No
Q14	Selection Number
Q15	Selection Number
Q16	Selection Number
Q17_1-Q17_7	1.Yes 2.No
Q18	Selection Number
Q19	Selection Number
Q20_1-Q20_9	1.Yes 2.No
Q21	Selection Number
Q22_1-Q22_6	1.Yes 2.No
Q23	Selection Number
Q24_1-Q24_6	1.Yes 2.No
Q25	Selection Number
Q26_1-Q26_9	1.Yes 2.No
Q27_1-Q27_10	1.Yes 2.No
Q28	Selection Number
Q29_1-Q29_3	1.Yes 2.No
Q30	Selection Number
Q31	Selection Number
Q32	Selection Number
Q33	Selection Number
Q34_1-Q34_14	1.Yes 2.No
